# Supplementary material
Source: PubMed Central journal article supplement (PMC6439770)
Supplement: jamaoncol-5-e182815-s001.pdf [file jamaoncol-5-e182815-s001.pdf]

## Supplementary Online Content

Hanna GB, Boshier PR, Markar SR, Romano A. Accuracy and Methodologic Challenges of Volatile Organic Compound–Based Exhaled Breath Tests for Cancer Diagnosis: A Systematic Review and Pooled Analysis. *JAMA Oncol*. Published online August 16, 2018. doi:10.1001/jamaoncol.2018.2815

Supplement. eTable 1. Search strategy for cancer systematic review

eTable 2. Modification of QUADAS-2 assessment tools

eTable 3. QUADAS-2 results

eTable 6. STARD assessment of each study

eTable 7. Summary of factors reported to influence levels of volatile organic compounds within exhaled breath

eFigure 1. Risk of bias and applicability concerns using QUADAS-2

eFigure 2. PRISMA flowchart of literature search

eTable 4. Details of studies on exhaled volatile organic compounds in cancer

eTable 5. Cancer VOCs in exhaled breath and their chemical class.

eFigure 3. Chemical classes of VOCs reported in different tumor sites.

This supplementary material has been provided by the authors to give readers additional information about their work.

**eTable 1.** Search strategy for cancer systematic review

| #  | Search                                                                                                                                                                     |
|----|----------------------------------------------------------------------------------------------------------------------------------------------------------------------------|
| 1  | (cancer or neoplasm* or malignancy).ab.                                                                                                                                    |
| 2  | limit 1 to abstracts                                                                                                                                                       |
| 3  | limit 2 to cochrane library [Limit not valid in Ovid MEDLINE(R),Ovid MEDLINE(R) Daily Update,Ovid MEDLINE(R) In-Process,Ovid MEDLINE(R) Publisher; records were retained]  |
| 4  | limit 3 to english language                                                                                                                                                |
| 5  | limit 4 to human                                                                                                                                                           |
| 6  | limit 5 to yr="2000 -Current"                                                                                                                                              |
| 7  | limit 6 to humans                                                                                                                                                          |
| 8  | (cancer or neoplasm* or malignancy).ti.                                                                                                                                    |
| 9  | limit 8 to abstracts                                                                                                                                                       |
| 10 | limit 9 to cochrane library [Limit not valid in Ovid MEDLINE(R),Ovid MEDLINE(R) Daily Update,Ovid MEDLINE(R) In-Process,Ovid MEDLINE(R) Publisher; records were retained]  |
| 11 | limit 10 to english language                                                                                                                                               |
| 12 | limit 11 to human                                                                                                                                                          |
| 13 | limit 12 to yr="2000 -Current"                                                                                                                                             |
| 14 | limit 13 to humans                                                                                                                                                         |
| 15 | 7 or 14                                                                                                                                                                    |
| 16 | (volatile organic compound* or VOC* or Breath or Exhaled).ab.                                                                                                              |
| 17 | limit 16 to abstracts                                                                                                                                                      |
| 18 | limit 17 to cochrane library [Limit not valid in Ovid MEDLINE(R),Ovid MEDLINE(R) Daily Update,Ovid MEDLINE(R) In-Process,Ovid MEDLINE(R) Publisher; records were retained] |
| 19 | limit 18 to english language                                                                                                                                               |
| 20 | limit 19 to human                                                                                                                                                          |
| 21 | limit 20 to yr="2000 -Current"                                                                                                                                             |
| 22 | limit 21 to humans                                                                                                                                                         |
| 23 | (volatile organic compound* or VOC* or Breath or Exhaled).ti.                                                                                                              |
| 24 | limit 23 to abstracts                                                                                                                                                      |
| 25 | limit 24 to cochrane library [Limit not valid in Ovid MEDLINE(R),Ovid MEDLINE(R) Daily Update,Ovid MEDLINE(R) In-Process,Ovid MEDLINE(R) Publisher; records were retained] |
| 26 | limit 25 to english language                                                                                                                                               |
| 27 | limit 26 to human                                                                                                                                                          |
| 28 | limit 27 to yr="2000 -Current"                                                                                                                                             |
| 29 | limit 28 to humans                                                                                                                                                         |
| 30 | 22 or 29                                                                                                                                                                   |
| 31 | 15 and 30                                                                                                                                                                  |
| 32 | remove duplicates from 31                                                                                                                                                  |

## Description of the modification and application of QUADAS-2

**eTable 2.** Modification of QUADAS-2 assessment tools

|                     | QUADAS-2                  | QUADAS-2 (modified)                                                                                      |                                                                                                        |
|---------------------|---------------------------|----------------------------------------------------------------------------------------------------------|--------------------------------------------------------------------------------------------------------|
| <b>RISK OF BIAS</b> | <b>Patient selection</b>  | Was a consecutive or random sample of patients enrolled?                                                 | Were sampled patients representative of the intended population? (Am)                                  |
|                     |                           | Was a case-control design avoided?                                                                       | Did the study include both positive (benign conditions) as well as healthy controls? (Am)              |
|                     |                           | Did the study avoid inappropriate exclusions?                                                            | Did the study avoid inappropriate exclusions? (Un)                                                     |
|                     | <b>Index test</b>         | Were the index test results interpreted without knowledge of the results of the reference standard?      | Was the index test and interpretation of data performed in standardised and reproducible fashion? (Am) |
|                     |                           | If a threshold was used, was it pre-specified?                                                           | Validation of results performed (internal or external)? (Am)                                           |
|                     | <b>Reference standard</b> | Is the reference standard likely to correctly classify the target condition?                             | Is the reference standard likely to correctly classify the target condition? (Un)                      |
|                     |                           | Were the reference standard results interpreted without knowledge of the results of the index test?      | - (Om)*                                                                                                |
|                     | <b>Flow and timing</b>    | Was there an appropriate interval between index test and reference standard?                             | Was there an appropriate interval between index test and reference standard? (Un)                      |
|                     |                           | -                                                                                                        | Were index test and reference standard performed prior to therapeutic intervention? (Ad)               |
|                     |                           | Did all patients receive the same reference standard?                                                    | Did all patients receive the same reference standard? (Un)                                             |
|                     |                           | Were all patients included in the analysis?                                                              | Were all patients included in the analysis? (Un)                                                       |
|                     | <b>APPLICABILITY</b>      | <b>Patient selection</b>                                                                                 | Are there concerns that the included patients and setting do not match the review question?            |
| <b>Index test</b>   |                           | Are there concerns that the index test, its conduct, or interpretation differs from the review question? | (Am)                                                                                                   |

| <b>Reference standard</b>                                                                                                                                                                                                                                                                                                                                                                                                                                                                                                                                                                                                                           | Are there concerns that the target condition as defined by the reference standard does not match the question? | Are there concerns that the target condition as defined by the reference standard does not match the question? | <b>(Un)</b> |
|-----------------------------------------------------------------------------------------------------------------------------------------------------------------------------------------------------------------------------------------------------------------------------------------------------------------------------------------------------------------------------------------------------------------------------------------------------------------------------------------------------------------------------------------------------------------------------------------------------------------------------------------------------|----------------------------------------------------------------------------------------------------------------|----------------------------------------------------------------------------------------------------------------|-------------|
| <p>Am = amendment. Om = omitted. Ad = addition. Un = unchanged. *Criteria omitted as not applicable in the case of phase 1 biomarker discovery studies</p> <p><u>REVIEW QUESTION</u></p> <p>Test population: human subLeCts</p> <p>Index test(s): VOC analysis within exhaled breath</p> <p>Reference standard: the accepted standard for diagnosis of cancer and/or benign disease in that field</p> <p>Target condition: cancer</p> <p>Setting: hospital, medical centre</p> <p>Intended use of the index test: diagnostic</p> <p>Patient presentation: routine investigation for symptoms of malignancy</p> <p>Prior testing: not applicable</p> |                                                                                                                |                                                                                                                |             |

| <b>eTable 3. QUADAS-2 results</b> |                  |             |                                             |                            |                                                   |                                          |                                             |                            |                                                   |
|-----------------------------------|------------------|-------------|---------------------------------------------|----------------------------|---------------------------------------------------|------------------------------------------|---------------------------------------------|----------------------------|---------------------------------------------------|
|                                   |                  |             | <b>RISK OF BIAS</b>                         |                            |                                                   |                                          | <b>APPLICABILITY CONCERNS</b>               |                            |                                                   |
|                                   |                  |             | <b>Pati<br/>ent<br/>sele<br/>ctio<br/>n</b> | <b>Inde<br/>x<br/>Test</b> | <b>Ref<br/>ere<br/>nce<br/>stan<br/>dar<br/>d</b> | <b>Flo<br/>w<br/>and<br/>tim<br/>ing</b> | <b>Pati<br/>ent<br/>sele<br/>ctio<br/>n</b> | <b>Inde<br/>x<br/>test</b> | <b>Ref<br/>ere<br/>nce<br/>stan<br/>dar<br/>d</b> |
| 1                                 | Barash<br>2015   | B           | L                                           | L                          | ?                                                 | H                                        | L                                           | L                          | L                                                 |
| 2                                 | Li 2014          | B           | L                                           | L                          | L                                                 | H                                        | L                                           | L                          | L                                                 |
| 3                                 | Mangler<br>2012  | B           | H                                           | H                          | ?                                                 | ?                                        | ?                                           | ?                          | ?                                                 |
| 4                                 | Peng<br>2010     | B           | H                                           | H                          | L                                                 | H                                        | ?                                           | L                          | L                                                 |
| 5                                 | Phillips<br>2003 | B           | ?                                           | L                          | L                                                 | H                                        | L                                           | ?                          | L                                                 |
| 6                                 | Phillips<br>2006 | B           | L                                           | L                          | L                                                 | H                                        | L                                           | ?                          | L                                                 |
| 7                                 | Wang<br>2014     | B           | L                                           | L                          | L                                                 | ?                                        | L                                           | ?                          | L                                                 |
| 8                                 | Amal<br>2015     | O           | L                                           | L                          | ?                                                 | H                                        | L                                           | ?                          | L                                                 |
| 9                                 | Peng<br>2010     | P           | H                                           | H                          | L                                                 | H                                        | ?                                           | L                          | L                                                 |
| 10                                | Guo<br>2015      | T           | H                                           | H                          | ?                                                 | ?                                        | L                                           | ?                          | L                                                 |
| 11                                | Gruber<br>2014   | H<br>&<br>N | L                                           | H                          | L                                                 | H                                        | L                                           | ?                          | L                                                 |
| 12                                | Hakim<br>2011    | H<br>&<br>N | H                                           | H                          | L                                                 | H                                        | L                                           | L                          | L                                                 |
| 13                                | Bouza<br>2017    | O<br>c      | H                                           | H                          | ?                                                 | H                                        | L                                           | L                          | L                                                 |
| 14                                | Szabó<br>2015    | O<br>c      | H                                           | H                          | ?                                                 | ?                                        | L                                           | L                          | L                                                 |
| 15                                | Altomar          | Cr          | H                                           | L                          | L                                                 | ?                                        | L                                           | ?                          | L                                                 |

|        |                        |             |   |   |   |   |   |   |   |
|--------|------------------------|-------------|---|---|---|---|---|---|---|
| 5      | e 2013                 |             |   |   |   |   |   |   |   |
| 1<br>6 | Amal<br>2015           | Cr          | ☺ | H | L | H | L | L | L |
| 1<br>7 | Peng<br>2010           | Cr          | H | H | L | H | ? | L | L |
| 1<br>8 | Wang<br>2014           | Cr          | H | H | L | H | L | ? | L |
| 1<br>9 | Abela<br>2009          | E<br>&<br>G | H | H | L | H | L | ? | L |
| 2<br>0 | Kumar<br>2013          | E<br>&<br>G | L | H | L | L | L | L | L |
| 2<br>1 | Kumar<br>2015          | E<br>&<br>G | L | H | L | L | L | L | L |
| 2<br>2 | Amal<br>2013           | G           | L | H | L | H | L | L | L |
| 2<br>3 | Amal<br>2016           | G           | L | H | L | ? | L | L | L |
| 2<br>4 | Xu<br>2013             | G           | L | H | L | H | L | L | L |
| 2<br>5 | Qin<br>2010            | Li          | L | H | L | H | L | ? | L |
| 2<br>6 | Garcia<br>2014         | L<br>a      | H | H | ? | ? | L | L | L |
| 2<br>7 | BaLtare<br>vic<br>2009 | L<br>u      | H | H | ? | H | L | ☺ | L |
| 2<br>8 | Bousa<br>mra<br>2014   | L<br>u      | H | H | ? | H | L | ? | L |
| 2<br>9 | Buszew<br>ski<br>2011  | L<br>u      | H | H | L | H | L | ? | L |

|    |                |        |   |   |   |   |   |   |   |
|----|----------------|--------|---|---|---|---|---|---|---|
| 30 | Buszewski 2012 | L<br>u | H | H | ? | ? | L | L | L |
| 31 | Chen 2005      | L<br>u | ? | H | ? | H | L | ? | L |
| 32 | Corradi 2015   | L<br>u | H | H | L | H | L | ? | L |
| 33 | Crohns 2009    | L<br>u | H | H | L | H | L | ? | L |
| 34 | Deng 2004      | L<br>u | H | H | ? | ? | L | L | L |
| 35 | Feinberg 2016  | L<br>u | H | H | L | H | L | ? | L |
| 36 | Filipiak 2014  | L<br>u | H | H | L | H | L | L | L |
| 37 | Fu 2014        | L<br>u | ? | H | ? | H | L | ? | L |
| 38 | Fuchs 2010     | L<br>u | H | H | ? | H | L | L | L |
| 39 | Gaspar 2009    | L<br>u | H | H | ? | ? | L | ? | L |
| 40 | Handa 2014     | L<br>u | H | H | L | H | L | ? | L |
| 41 | Kischke 2010   | L<br>u | H | H | H | ? | L | L | L |
| 42 | Li 2015        | L<br>u | ? | L | L | H | L | ? | L |
| 43 | Ligor 2009     | L<br>u | H | H | ? | H | L | L | L |
| 44 | Ligor 2015     | L<br>u | H | H | L | H | L | L | L |
| 45 | Ma 2014        | L<br>u | H | H | ? | H | L | ? | L |
| 46 | Ma 2015        | L<br>u | H | H | ? | ? | ? | ? | ? |

|    |                    |        |   |   |   |   |   |   |   |
|----|--------------------|--------|---|---|---|---|---|---|---|
| 47 | Peled 2012         | L<br>u | ? | H | L | H | L | ? | L |
| 48 | Peng 2009          | L<br>u | H | H | L | H | L | L | L |
| 49 | Peng 2010          | L<br>u | H | H | L | H | ? | L | L |
| 50 | Phillips 2003      | L<br>u | L | L | L | H | L | ? | L |
| 51 | Phillips 2007      | L<br>u | H | L | L | H | L | ? | L |
| 52 | Phillips 2008      | L<br>u | H | L | L | H | L | ? | L |
| 53 | Poli 2005          | L<br>u | L | H | L | H | L | ? | L |
| 54 | Poli 2010          | L<br>u | □ | L | L | H | L | L | L |
| 55 | Rudnicka 2011      | L<br>u | □ | H | ? | H | L | L | L |
| 56 | Sakumura 2017      | L<br>u | □ | H | ? | ? | L | ? | L |
| 57 | Schallschmidt 2016 | L<br>u | □ | H | ? | ? | L | L | L |
| 58 | Schumer 2015       | L<br>u | ? | H | L | H | L | ? | L |
| 59 | Schumer 2016       | L<br>u | H | H | L | H | L | ? | L |
| 60 | Skeldon 2006       | L<br>u | ? | H | L | H | L | L | L |
| 61 | Song 2010          | L<br>u | H | H | L | H | L | L | L |
| 62 | Ulanowska 2011     | L<br>u | H | H | L | H | L | ? | L |



|                                                                                                                                                                                              |                 |    |           |   |              |   |   |   |   |
|----------------------------------------------------------------------------------------------------------------------------------------------------------------------------------------------|-----------------|----|-----------|---|--------------|---|---|---|---|
| 63                                                                                                                                                                                           | Wang 2012       | Lu | ?         | H | L            | H | L | ? | L |
| 64                                                                                                                                                                                           | Wehinger 2007   | Lu | H         | L | L            | H | L | ? | L |
| 65                                                                                                                                                                                           | Zou 2014        | Lu | L         | L | L            | H | L | ? | L |
| 66                                                                                                                                                                                           | de Gennaro 2010 | M  | L         | H | L            | H | L | L | L |
| L                                                                                                                                                                                            | Low risk        | H  | High risk | ? | Unclear risk |   |   |   |   |
| B, breast; O, ovarian; P, prostate; Cr, colorectal; E&G, esophageal & gastric; G, gastric; Oc, oral cavity; H&N, head& neck; T, thyroid; Li, liver; La, laryngeal; Lu, lung; M, mesothelioma |                 |    |           |   |              |   |   |   |   |

**eFigure 1.** Risk of bias and applicability concerns using QUADAS-2

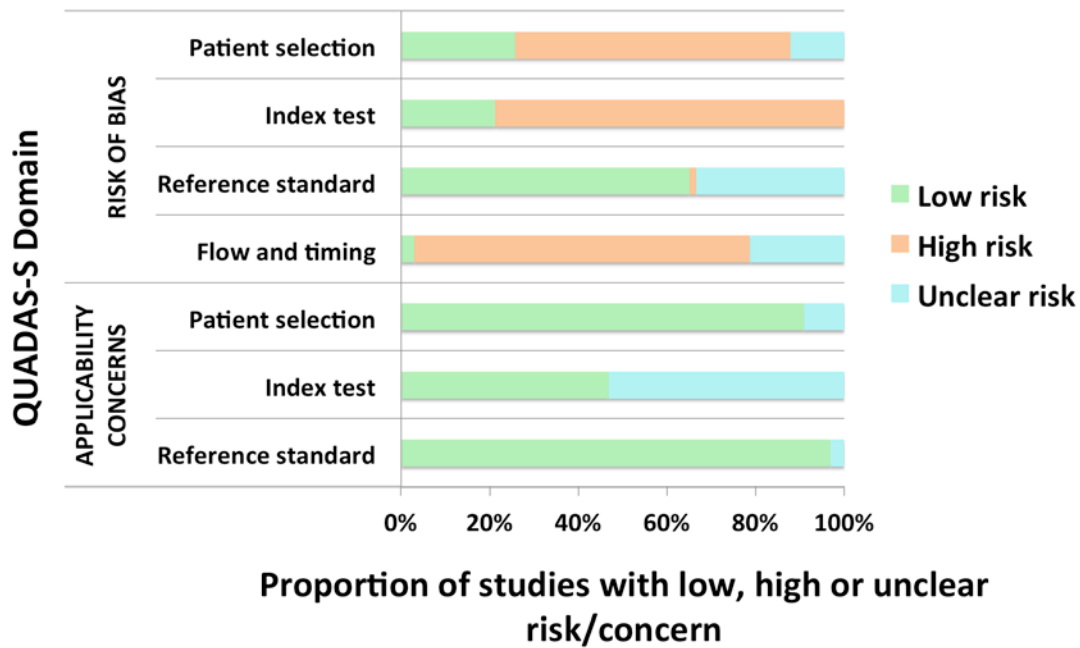

**eFigure 2.** PRISMA flow chart of literature search.\*One study by Peng et al., 2010 presented data for four cancer types, that are considered independently for the purpose of this review.

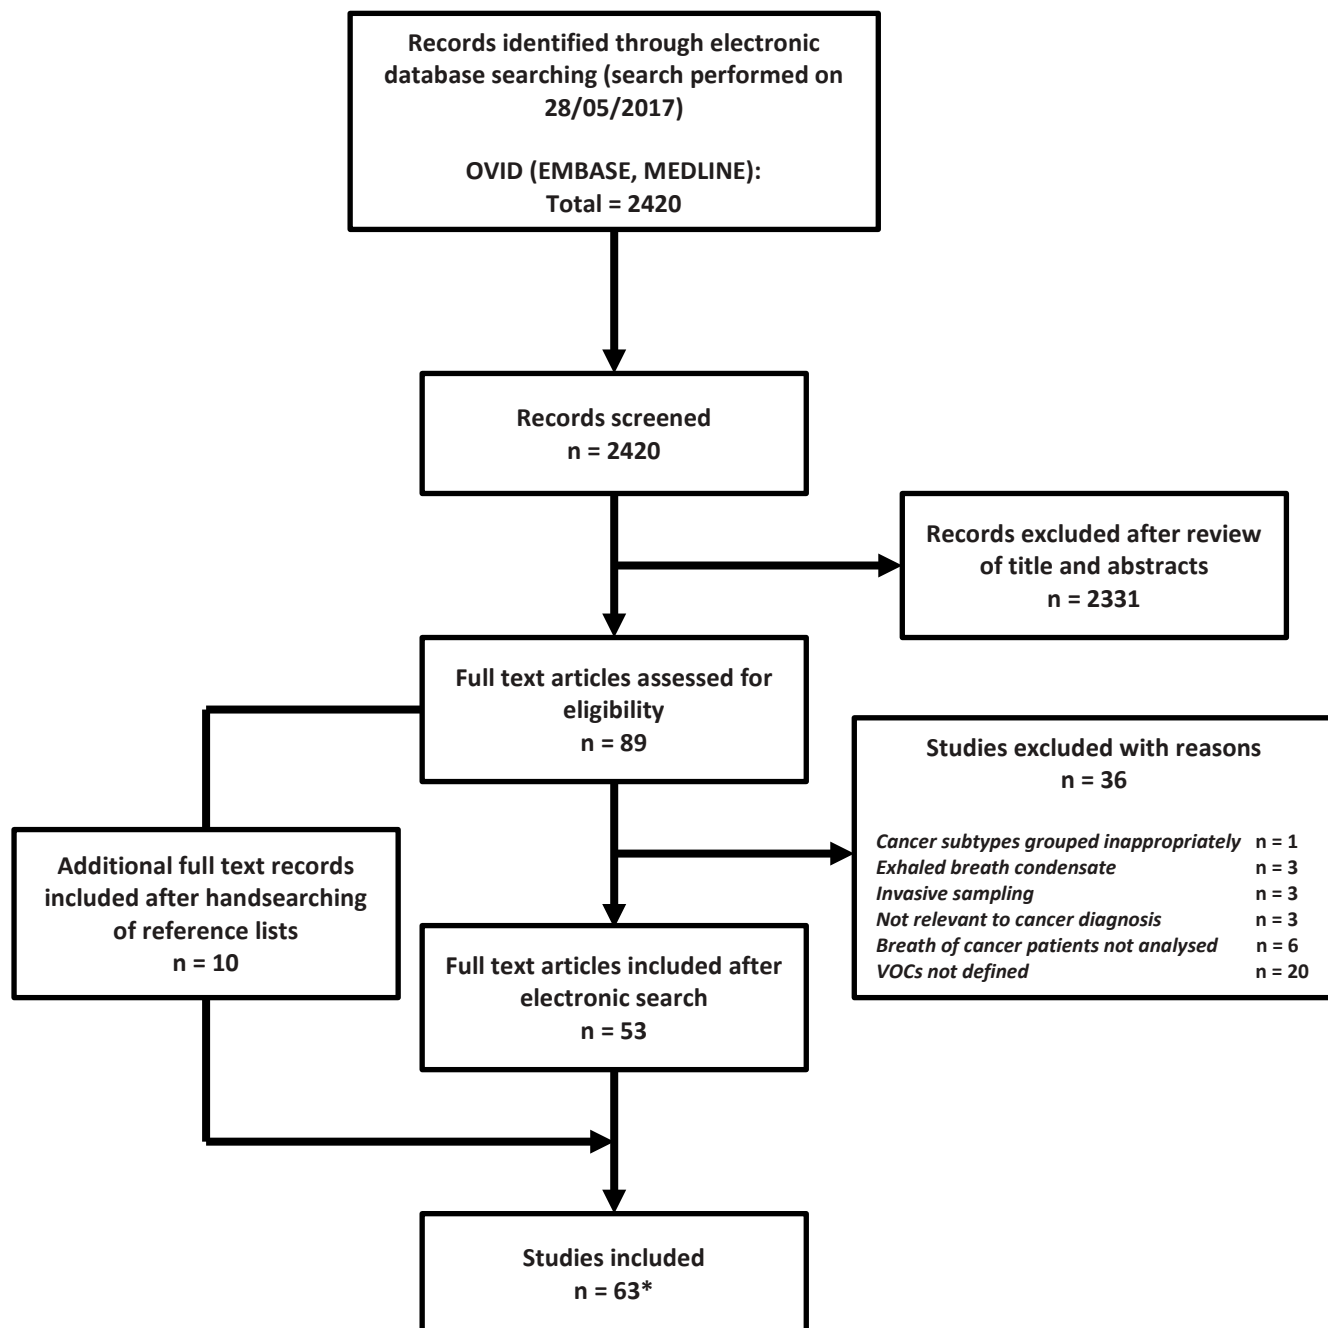

**eTable 4.** Details of studies on exhaled volatile organic compounds in cancer

| Author   | Year | Cancer | Cancer patients (No.) | Biomarker phase | Analytical platform | Volatile organic compounds                                                                                                                                                       | Sensitivity     | Specificity     | AUC               | STAR score | Ref.         |
|----------|------|--------|-----------------------|-----------------|---------------------|----------------------------------------------------------------------------------------------------------------------------------------------------------------------------------|-----------------|-----------------|-------------------|------------|--------------|
| Barash   | 2015 | Breast | 80                    | 1               | GC-MS               | Ethanol; Heptane; 2-propenoic acid, butyl ester; 6-methyl-5-Hepten-2-one                                                                                                         | 78 <sub>a</sub> | 61 <sub>a</sub> | 0.79 <sub>a</sub> | 17         | <sup>1</sup> |
| Li       | 2014 | Breast | 22                    | 1               | GC-MS               | Hexanal; heptanal; octanal; nonanal                                                                                                                                              | 68 <sub>a</sub> | 91 <sub>a</sub> | 0.90 <sub>b</sub> | 20         | <sup>2</sup> |
| Mangler  | 2012 | Breast | 10                    | 1               | GC-MS               | 3-methylhexane; decene <sup>c</sup> ; caryophyllene <sup>c</sup> ; naphthalene <sup>c</sup> ; trichlorethylene <sup>c</sup>                                                      | -               | -               | -                 | 12         | <sup>3</sup> |
| Peng*    | 2010 | Breast | 14                    | 1               | GC-MS               | 3,3-dimethyl pentane; 2-amino-5-isopropyl-8-methyl-1-azulenecarbonitrile; 5-(2-methylpropyl)nonane; 2,3,4-trimethyl decane; 6-ethyl-3-octyl ester 2-trifluoromethyl benzoic acid | -               | -               | -                 | 14         | <sup>4</sup> |
| Phillips | 2013 | Breast | 51                    | 1               | GC-MS               | Nonane; tridecane; 5-methyl undecane; 3-methyl pentadecane; 6-methyl propane; 2-methyl nonadecane, 3-methyl dodecane, 4-methyl octane, 2-methyl                                  | 88 <sub>a</sub> | 73 <sub>a</sub> | -                 | 18         | <sup>5</sup> |
| Phillips | 2016 | Breast | 51                    | 1               | GC-MS               | 2-propanol; 2,3-dihydro-1-phenyl-4(1H)-quinazolinone; 1-phenyl-ethanone; heptanal; isopropyl myristate                                                                           | 93 <sub>a</sub> | 84 <sub>a</sub> | 0.9 <sub>a</sub>  | 13         | <sup>6</sup> |
| Wang     | 2014 | Breast | 39                    | 1               | GC-MS               | Cyclohexanone; 1,4-Dimethoxy-2,3-butanediol; 2,5,6-trimethyloctane                                                                                                               | -               | -               | -                 | 14         | <sup>7</sup> |

|                 |      |             |    |   |             |                                                                                                                                                                                                                          |                  |                  |                   |    |               |
|-----------------|------|-------------|----|---|-------------|--------------------------------------------------------------------------------------------------------------------------------------------------------------------------------------------------------------------------|------------------|------------------|-------------------|----|---------------|
| <b>Amal</b>     | 2015 | Ovarian     | 48 | 1 | GC-MS       | Decanal; nonanal; styrene; 2-butanone; hexadecane                                                                                                                                                                        | -                | -                | -                 | 14 | <sup>8</sup>  |
| <b>Peng*</b>    | 2010 | Prostate    | 13 | 1 | GC-MS       | Toluene; 2-amino-5-isopropyl-8-methyl-azulene carbonitrile; p-xylene; 2,2-dimethyl decane                                                                                                                                | -                | -                | -                 | 14 | <sup>4</sup>  |
| <b>Guo</b>      | 2015 | Thyroid     | 39 | 1 | GC-MS       | Cyclohexanone; 4-hydroxybutyric acid; phenol; 2,2-dimethyldecane; ethylhexanol; ethyleneglycol mono vinyl ester; cyclopropane; 1-bromo-1-(3-methyl-1-pentenylidene)-2,2,3,3-tetramethyl                                  | 100 <sup>a</sup> | 100 <sup>a</sup> | 10 <sup>a</sup>   | 13 | <sup>9</sup>  |
| <b>Gruber</b>   | 2014 | H&N         | 22 | 1 | GC-MS       | Ethanol; 2-propenenitrile; undecane                                                                                                                                                                                      | -                | -                | -                 | 15 | <sup>10</sup> |
| <b>Hakim</b>    | 2011 | H&N         | 8  | 1 | GC-MS       | 4,6-dimethyl-dodecane; 2,2-dimethyl-propanoic acid; 5-methyl-3-hexanone; 2,2-dimethyl-decane; limonene; 2,2,3-erimethyl-, exo- bicyclo[2.2.1]heptane                                                                     | -                | -                | -                 | 12 | <sup>11</sup> |
| <b>Boza</b>     | 2017 | Oral cavity | 26 | 1 | GC-MS       | Undecane; dodecane; decanal; benzaldehyde; 3,7-dimethylundecane; 4,5-dimethyl-nonane; 1-octene; hexadecane                                                                                                               | -                | -                | -                 | 11 | <sup>12</sup> |
| <b>Szabó</b>    | 2015 | Oral cavity | 14 | 1 | Portable GC | Hydrogen sulphide; Isoprene; Methyl mercaptan; Dimethyl sulphide; Acetaldehyde <sup>d</sup>                                                                                                                              | -                | -                | -                 | 11 | <sup>13</sup> |
| <b>Altomare</b> | 2013 | Colorectal  | 37 | 1 | GC-MS       | Nonanal; 4-methyl-2-pentanone; decanal; 2-methylbutane; 1,2-pentadiene; 2-methylpentane; 3-methylpentane; methylcyclohexane; 1,3-dimethylbenzene; 4-methyloctane; 1,4-dimethylbenzene; 4-methylundecane; trimethyldecane | 86 <sup>a</sup>  | 83 <sup>a</sup>  | 0.85 <sup>a</sup> | 20 | <sup>14</sup> |
| <b>Amal</b>     | 2016 | Colorectal  | 65 | 1 | GC-MS       | Ethanol; acetone; ethyl acetate; 4-methyl octane                                                                                                                                                                         | -                | -                | -                 | 20 | <sup>15</sup> |

|                        |                  |                        |                 |   |             |                                                                                                                                                                                                                                       |               |               |                       |    |                           |
|------------------------|------------------|------------------------|-----------------|---|-------------|---------------------------------------------------------------------------------------------------------------------------------------------------------------------------------------------------------------------------------------|---------------|---------------|-----------------------|----|---------------------------|
| <b>Pe<br/>ng*</b>      | 2<br>0<br>1<br>0 | Col<br>ore<br>cta<br>l | 22              | 1 | GC-<br>MS   | 1,1-(1-butenylidene)bis benzene; 1,3-dimethyl benzene; 1-iodo nonane; [(1,1-dimethylethylthio) acetic acid; 4-(4-propylcyclohexyl)-4-cyano[1,1'-biphenyl]-4-yl ester benzoic acid; 2-amino-5-isopropyl-8-methyl-1-azulenecarbonitrile | -             | -             | -                     | 14 | <sup>4</sup>              |
| <b>Wa<br/>ng</b>       | 2<br>0<br>1<br>4 | Col<br>ore<br>cta<br>l | 20              | 1 | GC-<br>MS   | Cyclohexanone; 2,2-dimethyldecane; dodecane, 4-ethyl-1-octyn-3-ol; ethylaniline; cyclooctylmethanol; trans-2-dodecen-1-ol; 3-hydroxy- 2,4,4-trimethylpentyl 2-methylpropanoate; 6-t-butyl-2,2,9,9-tetramethyl-3,5-decadien-7-yne      | -             | -             | -                     | 13 | <sup>1</sup> <sub>6</sub> |
| <b>Ab<br/>ela</b>      | 2<br>0<br>0<br>9 | O<br>G                 | 20              | 1 | TDLS        | Ethane <sup>d</sup>                                                                                                                                                                                                                   | -             | -             | -                     | 14 | <sup>1</sup> <sub>7</sub> |
| <b>Ku<br/>ma<br/>r</b> | 2<br>0<br>1<br>3 | O<br>G                 | 18              | 1 | SIFT-<br>MS | Hexanoic acid; phenol; methyl-phenol; ethyl-phenol                                                                                                                                                                                    | -             | -             | 0                     | 18 | <sup>1</sup> <sub>8</sub> |
| <b>Ku<br/>ma<br/>r</b> | 2<br>0<br>1<br>5 | O<br>G                 | 81              | 1 | SIFT-<br>MS | Pentanoic acid; hexanoic acid; phenol; methyl phenol; ethyl phenol; butanal; pentanal; hexanal; heptanal; octanal; nonanal; decanal                                                                                                   | 86<br>·7<br>a | 81<br>·2<br>a | 0<br>·<br>8<br>7<br>a | 22 | <sup>1</sup> <sub>9</sub> |
| <b>Am<br/>al</b>       | 2<br>0<br>1<br>3 | Ga<br>stri<br>c        | 74 <sup>e</sup> | 1 | GC-<br>MS   | 2-Propenenitrile; 2-butoxy-ethanol; furfural; 6-methyl-5-hepten-2-one; isoprene; styrene; 6-methyl-5-hepten-2-one; 2-ethyl-1 hexanol; Nonanal                                                                                         | -             | -             | -                     | 15 | <sup>2</sup> <sub>0</sub> |
| <b>Am<br/>al</b>       | 2<br>0<br>1<br>6 | Ga<br>stri<br>c        | 99              | 1 | GC-<br>MS   | 2-propenenitrile; furfural; 2-butoxy-ethanol; hexadecane; 4-methyl-octane; 1,2,3-trimethyl-benzene; a-methyl-styrene; 2-butanone <sup>f</sup>                                                                                         | -             | -             | -                     | 20 | <sup>2</sup> <sub>1</sub> |
| <b>Xu</b>              | 2<br>0<br>1<br>3 | Ga<br>stri<br>c        | 37              | 1 | GC-<br>MS   | 2-propenenitrile; furfural; 6-methyl-5-hepten-2-one                                                                                                                                                                                   | -             | -             | -                     | 21 | <sup>2</sup> <sub>2</sub> |
| <b>Qin</b>             | 2<br>0<br>1<br>0 | Liv<br>er              | 30              | 1 | GC-<br>MS   | 3-hydroxy-2-butanone; styrene; decane                                                                                                                                                                                                 | 83<br>·3<br>a | 91<br>·7<br>a | -                     | 18 | <sup>2</sup> <sub>3</sub> |
| <b>Ga<br/>rci</b>      | 2<br>0           | Lar<br>yn              | 10              | 1 | GC-<br>MS   | Ethanol; 2-butanone; 2,3-butanediol; 9-tetradecen-1-ol; octene derivative; cycloheptane derivative; cyclononane derivative                                                                                                            | -             | -             | -                     | 8  | <sup>2</sup> <sub>4</sub> |

|                     |      |       |        |   |                           |                                                                                                                                                                                                                                                                                                                                                                                                                                                                   |                 |                  |     |    |    |  |
|---------------------|------|-------|--------|---|---------------------------|-------------------------------------------------------------------------------------------------------------------------------------------------------------------------------------------------------------------------------------------------------------------------------------------------------------------------------------------------------------------------------------------------------------------------------------------------------------------|-----------------|------------------|-----|----|----|--|
| <b>a</b>            | 14   | geal  |        |   |                           |                                                                                                                                                                                                                                                                                                                                                                                                                                                                   |                 |                  |     |    |    |  |
| <b>Bajtar evic</b>  | 2009 | Lu ng | 220/65 | 1 | PTR-MS/GC-MS <sup>g</sup> | 2-butanone; benzaldehyde; 2,3-butanedione; 1-propanol; 3-hydroxy-2-butanone; 3-butyn-2-ol; 2-methylbutane; 2-butene, 2-methyl; acetophenone; 1-cyclopentene; methyl propyl sulfide; Urea, tetramethyl-n-pentanal; 1-methyl-1,3 cyclopentadiene; 2,3-dimethyl-2-butanol; 1,2,3,4-tetrahydro-isoquinoline; 3,7-dimethyl-undecane; cyclobutyl-benzene; butyl acetate; ethylenimine; n-undecane; isoprene <sup>h</sup> ; acetone <sup>h</sup> ; methanol <sup>h</sup> | 80 <sup>i</sup> | 100 <sup>i</sup> | -   | 11 | 25 |  |
| <b>Bo us am ra</b>  | 2014 | Lu ng | 107    | 1 | FT-ICR-MS                 | 2-butanone; 3-hydroxy-2-butanone; 2-hydroxyacetaldehyde; 4-hydroxyhexenal                                                                                                                                                                                                                                                                                                                                                                                         | 28              | 100              | 086 | 13 | 26 |  |
| <b>Bu sze ws ki</b> | 2011 | Lu ng | 115    | 1 | GC-MS                     | Ethanol; acetone; carbon disulfide; dimethyl sulfide; 2-propanol; 2-butanone; 2-pentanone; acetonitrile <sup>i</sup> ; 1-propanol <sup>i</sup>                                                                                                                                                                                                                                                                                                                    | -               | -                | -   | 12 | 27 |  |
| <b>Bu sze ws ki</b> | 2012 | Lu ng | 29     | 1 | GC-MS                     | Acetone; benzene; butanal; 2-butanone; ethyl acetate; ethylbenzene; furan; 2-pentanone; propanal; 1-propanol; 2-propanol; 2-propenal                                                                                                                                                                                                                                                                                                                              | -               | -                | -   | 5  | 28 |  |
| <b>Ch en</b>        | 2005 | Lu ng | 5      | 1 | SAW sensor                | Styrene; decane; isoprene; benzene; undecane; hexanal; 1,2,4-trimethyl benzene; heptanal                                                                                                                                                                                                                                                                                                                                                                          | -               | -                | -   | 6  | 29 |  |
| <b>Co rra di</b>    | 2015 | Lu ng | 71     | 1 | GC-MS                     | Ethyl benzene; hexane; trans-2-nonenal                                                                                                                                                                                                                                                                                                                                                                                                                            | -               | -                | -   | 22 | 30 |  |
| <b>Cr oh ns</b>     | 2009 | Lu ng | 11     | 1 | GC-MS                     | Pentane                                                                                                                                                                                                                                                                                                                                                                                                                                                           | -               | -                | -   | 15 | 31 |  |
| <b>De ng</b>        | 2004 | Lu ng | 10     | 1 | GC-MS                     | Hexanal; heptanal                                                                                                                                                                                                                                                                                                                                                                                                                                                 | -               | -                | -   | 7  | 32 |  |

|                 |      |       |    |   |                     |                                                                                                                                                                                        |                   |                   |                   |    |                           |
|-----------------|------|-------|----|---|---------------------|----------------------------------------------------------------------------------------------------------------------------------------------------------------------------------------|-------------------|-------------------|-------------------|----|---------------------------|
| <b>Feinberg</b> | 2016 | Lu ng | 22 | 1 | PTR-MS              | m/z 61 (proposed identity: acetic acid, isopropanol) <sup>d</sup>                                                                                                                      | -                 | -                 | -                 | 15 | <sup>3</sup> <sub>3</sub> |
| <b>Filiplik</b> | 2014 | Lu ng | 36 | 1 | GC-MS               | n-octane; n-nonane; 2,3-butanedione <sup>k</sup>                                                                                                                                       | -                 | -                 | -                 | 12 | <sup>3</sup> <sub>4</sub> |
| <b>Fu</b>       | 2014 | Lu ng | 97 | 1 | FT-ICR-MS           | 2-butanone; 3-hydroxy-2-butanone; 2-hydroxyacetaldehyde; 4-hydroxyhexenal                                                                                                              | 89.8 <sup>l</sup> | 81.3 <sup>l</sup> | -                 | 10 | <sup>3</sup> <sub>5</sub> |
| <b>Fuchs</b>    | 2010 | Lu ng | 12 | 1 | GC-MS               | Pentanal; hexanal; octanal; nonanal                                                                                                                                                    | 75 <sub>m</sub>   | 95.8 <sub>m</sub> | -                 | 11 | <sup>3</sup> <sub>6</sub> |
| <b>Gasparr</b>  | 2009 | Lu ng | 18 | 1 | GC-MS               | 2-methylundecane; 2-methyltridecane; 2-methyltetradecane; 3-methyltetradecane; <i>n</i> -C15H32; 3-methylpentadecane; branched-C16H34; 2-methylhexadecane                              | 100 <sup>n</sup>  | 100 <sup>n</sup>  | -                 | 5  | <sup>3</sup> <sub>7</sub> |
| <b>Handa</b>    | 2014 | Lu ng | 50 | 1 | IMS                 | n-dodecane; 3-methyl-1-butanol; 2-methylbutylacetat or 2-hexanol; cyclohexanon; isopropylamin; n-nonanal or cyclohexanon; ethylbenzol; hexanal; heptanal; 3-methyl-1-butanol           | 76                | 100               | -                 | 17 | <sup>3</sup> <sub>8</sub> |
| <b>Kischkel</b> | 2010 | Lu ng | 31 | 1 | GC-MS               | Acetonitrile; benzene; 2,5-dimethyl furan; acetone; dimethyl sulfide; dimethyl formamide; 2-methyl-1,3-butadiene; toluene; butane; propanal; butanal; hexanal; isopropanol; 1-propanol | -                 | -                 | -                 | 8  | <sup>3</sup> <sub>9</sub> |
| <b>Li</b>       | 2015 | Lu ng | 85 | 1 | FT-ICR-MS and GC-MS | 2-butanone; 4-hydroxy-2-hexenal; 3-hydroxy-2-butanone; hydroxyacetaldehyde; hydroxy-2-nonenal; 2-pentanone / pentanal                                                                  | 96 <sub>o</sub>   | 84 <sub>o</sub>   | 0.96 <sub>p</sub> | 19 | <sup>4</sup> <sub>0</sub> |
| <b>Ligor</b>    | 2009 | Lu ng | 65 | 1 | GC-MS               | 1-propanol; 2-butanone; 3-butyn-2-ol; benzaldehyde; 2-methyl-pentane; 3-methyl-pentane; n-pentane; n-hexane                                                                            | 51                | 100               | -                 | 12 | <sup>4</sup> <sub>1</sub> |



|                          |                  |          |     |   |                   |                                                                                                                                                                                                                                                                                                                                                                                                                                                                                                                                                                                                                                                                                                                                                                                                                                                                                                                                                                                                                                     |               |               |                   |    |        |
|--------------------------|------------------|----------|-----|---|-------------------|-------------------------------------------------------------------------------------------------------------------------------------------------------------------------------------------------------------------------------------------------------------------------------------------------------------------------------------------------------------------------------------------------------------------------------------------------------------------------------------------------------------------------------------------------------------------------------------------------------------------------------------------------------------------------------------------------------------------------------------------------------------------------------------------------------------------------------------------------------------------------------------------------------------------------------------------------------------------------------------------------------------------------------------|---------------|---------------|-------------------|----|--------|
| <b>Lig<br/>or</b>        | 2<br>0<br>1<br>5 | Lu<br>ng | 123 | 1 | GC-<br>MS         | Butane; 2-methyl-butane; 4-methyl-octane; propane; 2-pentanone; propanal; 2,4-dimethyl-heptane; propene                                                                                                                                                                                                                                                                                                                                                                                                                                                                                                                                                                                                                                                                                                                                                                                                                                                                                                                             | 63<br>.5<br>a | 72<br>.4<br>a | 0<br>.6<br>5<br>a | 11 | 4<br>2 |
| <b>Ma</b>                | 2<br>0<br>1<br>4 | Lu<br>ng | 13  | 1 | GCx<br>GC-<br>FID | Acetone; isoprene; methanol; pentane; propanol                                                                                                                                                                                                                                                                                                                                                                                                                                                                                                                                                                                                                                                                                                                                                                                                                                                                                                                                                                                      | -             | -             | -                 | 13 | 4<br>3 |
| <b>Ma</b>                | 2<br>0<br>1<br>5 | Lu<br>ng | 10  | 1 | GC-<br>MS         | Toluene; ethylbenzene; p-xylene + m-xylene; o-xylene; isopropyl benzene                                                                                                                                                                                                                                                                                                                                                                                                                                                                                                                                                                                                                                                                                                                                                                                                                                                                                                                                                             | -             | -             | -                 | 5  | 4<br>4 |
| <b>Pel<br/>ed</b>        | 2<br>0<br>1<br>2 | Lu<br>ng | 28  | 1 | GC-<br>MS         | 1-octene                                                                                                                                                                                                                                                                                                                                                                                                                                                                                                                                                                                                                                                                                                                                                                                                                                                                                                                                                                                                                            | -             | -             | -                 | 13 | 4<br>5 |
| <b>Pe<br/>ng</b>         | 2<br>0<br>0<br>9 | Lu<br>ng | 40  | 1 | GC-<br>MS         | Hydrazine-carboxamide; methyl hydrazine; ethyl alcohol; o-xylene; 1-methyl-4-(1-methylethyl)-benzene; ethylbenzene; styrene; toluene; dimethyl ether; butylated hydroxytoluene; carbonic dihydrazide; 1-methyl-2-(1-methylethyl)-benzene; 1-methyl-3-(1-methylethyl)-benzene; 1,3,5-cycloheptatriene; 3-methyl-hexane; 3-ethyl-pentane; 1,3,5,7-cyclooctatetraene; bicyclo[4.2.0]octa-1,3,5-triene; 2,3,4-trimethyl-hexane; 2,6-bis(1,1-dimethylethyl)-4-methyl-methylcarbamate phenol; 2,4-dimethyl-heptane; 4,7-dimethyl-undecane; 2,4,6-Tris(1,1-dimethyl-ethyl)-4-methylcyclohexa-2,5-dien-1-one; 2,6,6-trimethyl octane; 2-butanone; hydrazine; 1,3-pentadiene; 3,3-dimethyl-pentane; 3,3-dimethyl-hexane; 2-methyl-hexane; 3-ethyl-hexane; 2,2,3-trimethyl-hexane; ethylidene cyclopropane; 4-methyl-octane; 2-ethyl-1-hexanol; 2-ethyl-4-methyl-1-pentanol; 2,3,4-trimethyl-pentane; 2,3-dimethyl-hexane; 3-ethyl-3-methyl-2-pentanone; 2-methyl-4,6-octadiyn-3-one; 2-propyl-1-pentanol; 6,10-dimethyl-5,9-dodecadien-2-one | -             | -             | -                 | 13 | 4<br>6 |
| <b>Pe<br/>ng*</b>        | 2<br>0<br>1<br>0 | Lu<br>ng | 16  | 1 | GC-<br>MS         | 1-methyl-4-(1-methylethyl)benzene; toluene; dodecane; 3,3-dimethyl pentane; 2,3,4-trimethyl hexane; 1,1'-(1-butenylidene)bis benzene                                                                                                                                                                                                                                                                                                                                                                                                                                                                                                                                                                                                                                                                                                                                                                                                                                                                                                | -             | -             | -                 | 14 | 4      |
| <b>Phi<br/>lip<br/>s</b> | 2<br>0<br>0<br>3 | Lu<br>ng | 67  | 1 | GC-<br>MS         | Butane; tridecane,3-methyl; tridecane, 7-methyl; octane, 4-methyl; hexane, 3-methyl; heptane; hexane; 2-methyl; pentane; decane, 5-methyl                                                                                                                                                                                                                                                                                                                                                                                                                                                                                                                                                                                                                                                                                                                                                                                                                                                                                           | 85<br>.1<br>a | 80<br>.5<br>a | -                 | 19 | 4<br>7 |

|                 |      |       |     |   |           |                                                                                                                                                                                                                                                                                                                                                                                                                                                                                                                                                                                                                                                                                                                                                                                                                                                                                                                                                                                                                                                                                                                                                                                                     |               |               |                       |    |        |
|-----------------|------|-------|-----|---|-----------|-----------------------------------------------------------------------------------------------------------------------------------------------------------------------------------------------------------------------------------------------------------------------------------------------------------------------------------------------------------------------------------------------------------------------------------------------------------------------------------------------------------------------------------------------------------------------------------------------------------------------------------------------------------------------------------------------------------------------------------------------------------------------------------------------------------------------------------------------------------------------------------------------------------------------------------------------------------------------------------------------------------------------------------------------------------------------------------------------------------------------------------------------------------------------------------------------------|---------------|---------------|-----------------------|----|--------|
| <b>Phillips</b> | 2007 | Lu ng | 193 | 1 | GC-MS     | 1,5,9-trimethyl-1,5,9-cyclododecatriene; 2,2,4-trimethyl pentan-1,3-dioldiisobutyrate; 4-ethoxy-benzoic acid, ethyl ester; 2-methyl propanoic acid; 10,11-dihydro-5H-dibenz-(B,F)-azepine; 2,5-cyclohexadiene-1,4-dione; benzene, 1,1-oxybis; 2,5-dimethyl-furan; 2,2-diethyl-1,1-biphenyl; 2,4-dimethyl-3-pentanone; trans-caryophyllene; 2,3-dihydro-1,1,3-trimethyl-3-phenyl 1H-Indece; 1-propanol; decane, 4-methyl; diethyl ester 1,2-benzenedicarboxylic acid; 2,5-dimethyl-2,4-Hexadiene                                                                                                                                                                                                                                                                                                                                                                                                                                                                                                                                                                                                                                                                                                     | 84<br>.6<br>a | 80<br>.0<br>a | 0<br>.<br>8<br>8<br>a | 18 | 4<br>8 |
| <b>Phillips</b> | 2008 | Lu ng | 193 | 1 | GC-MS     | Isopropyl alcohol; 4-penten-2-ol; 1,1,2-trichloro-1,2,2-trifluoro-ethane; 2-methoxy-2-methyl-propane; 1-propene, 1-(methylthio)-, (E)-; 2,3-hexanedione; 5,5-dimethyl-1,3-hexadiene; 3-hexanone, 2-methyl-; 1H-indene, 2,3-dihydro-4-methyl-; camphor; 1,7,7-trimethyl-bicyclo[2.2.1]heptan-2-one, (1S)-; à,à4-trimethyl-3-cyclohexene-1-methanol; p-menth-1-en-8-ol; 5-isopropenyl-2-methyl-7-oxabicyclo[4.1.0]heptan-2-ol; à Isomethyl ionone; 2,2,7,7-tetramethyltricyclo[6.2.1.0(1,6)]undec-4-en-3-one; 2,2,4-trimethyl-1,3-pentanediol diisobutyrate; 4-ethoxy-benzoic acid, ethyl ester; bicyclo[3.2.2]nonane-1,5-dicarboxylic acid, 5-ethyl ester; pentanoic acid, 2,2,4-trimethyl-3-carboxyisopropyl, isobutylester propanoic acid, 2-methyl-, 1-(1,1-dimethylethyl)-2-methyl-1,3-; propanediyl ester; 3,3,6,6-tetraphenyl-1,2,4,5-tetroxane; benzophenone; 2,6-bis(1,1-dimethylethyl)-4-ethylidene-2,5-cyclohexadien-1-one; 2-[(2-ethoxy-3,4-dimethyl-2-cyclohexen-1-ylidene) methyl]-furan; 1,1-(1,2-cyclobutanediyl)bis-, cis-Benzene; 1,1-[1-(ethylthio)propylidene]bis-benzene; 1,2,3,4-tetrahydro-9-propyl-anthracene; 2-ethyl-9,10-anthracenediol; 1,1-ethylidenebis 4-ethyl-benzene | 84<br>.5      | 81            | 0<br>.<br>9           | 15 | 4<br>9 |
| <b>Polii</b>    | 2005 | Lu ng | 36  | 1 | GC-MS     | 2-methylpentane; pentane; ethylbenzene xylenes total; trimethylbenzene; toluene; benzene; decane; octane; pentamethylheptane                                                                                                                                                                                                                                                                                                                                                                                                                                                                                                                                                                                                                                                                                                                                                                                                                                                                                                                                                                                                                                                                        | 72<br>.2      | 93<br>.6      | -                     | 16 | 5<br>0 |
| <b>Polii</b>    | 2010 | Lu ng | 40  | 1 | GC-MS     | Propanal; butanal; pentanal; hexana; heptanal; octanal; nonanal                                                                                                                                                                                                                                                                                                                                                                                                                                                                                                                                                                                                                                                                                                                                                                                                                                                                                                                                                                                                                                                                                                                                     | 90            | 92<br>.1      | -                     | 16 | 5<br>1 |
| <b>Rudnicka</b> | 2011 | Lu ng | 23  | 1 | GC-TOF/MS | Isopropyl alcohol; styrene; pentanal; carbon disulfide; 2-methyl-furan; ethylbenzene; isobutane; 2-propenal; propane; 3-methyl-furan; propanal; cyclopentane; butanal; pentane                                                                                                                                                                                                                                                                                                                                                                                                                                                                                                                                                                                                                                                                                                                                                                                                                                                                                                                                                                                                                      | -             | -             | -                     | 5  | 5<br>2 |
| <b>Sakumura</b> | 2017 | Lu ng | 107 | 1 | GC-MS     | Hydrogen cyanide; methanol; acetonitrile; isoprene; 1-propanol                                                                                                                                                                                                                                                                                                                                                                                                                                                                                                                                                                                                                                                                                                                                                                                                                                                                                                                                                                                                                                                                                                                                      | 95            | 89            | -                     | 7  | 5<br>3 |

|                                                                       |                  |          |     |   |                            |                                                                                                                                                                                                                                                                                                                                                                                                                                                                                                                                    |                            |                            |                                  |    |                   |
|-----------------------------------------------------------------------|------------------|----------|-----|---|----------------------------|------------------------------------------------------------------------------------------------------------------------------------------------------------------------------------------------------------------------------------------------------------------------------------------------------------------------------------------------------------------------------------------------------------------------------------------------------------------------------------------------------------------------------------|----------------------------|----------------------------|----------------------------------|----|-------------------|
| <b>Sc<br/>h<br/>a<br/>l<br/>s<br/>c<br/>h<br/>m<br/>i<br/>d<br/>t</b> | 2<br>0<br>1<br>6 | Lu<br>ng | 37  | 1 | GC-<br>MS                  | Propanal; n-butanal; n-decanal; 1-butanol; 2-butanone; ethylbenzene                                                                                                                                                                                                                                                                                                                                                                                                                                                                | 10<br>0 <sup>a</sup>       | 10<br>0 <sup>a</sup>       | -                                | 10 | <sup>5</sup><br>4 |
| <b>Sc<br/>h<br/>u<br/>m<br/>e<br/>r</b>                               | 2<br>0<br>1<br>5 | Lu<br>ng | 156 | 1 | Silico<br>n<br>chip-<br>MS | 2-butanone; 3-hydroxy-2-butanone; 2-hydroxyacetaldehyde; 4-hydroxyhexenal                                                                                                                                                                                                                                                                                                                                                                                                                                                          | 95<br>.5 <sub>q</sub>      | 64<br>.4 <sub>q</sub>      | -                                | 14 | <sup>5</sup><br>5 |
| <b>Sc<br/>h<br/>u<br/>m<br/>e<br/>r</b>                               | 2<br>0<br>1<br>6 | Lu<br>ng | 31  | 1 | Silico<br>n<br>chip-<br>MS | 2-butanone; 2-hydroxyacetaldehyde; 4-hydroxyhexanol; 3-hydroxy-2-butanone                                                                                                                                                                                                                                                                                                                                                                                                                                                          | -                          | -                          | -                                | 13 | <sup>5</sup><br>6 |
| <b>Sk<br/>e<br/>l<br/>d<br/>o<br/>n</b>                               | 2<br>0<br>0<br>6 | Lu<br>ng | 12  | 1 | TDLS                       | Ethane <sup>d</sup>                                                                                                                                                                                                                                                                                                                                                                                                                                                                                                                | -                          | -                          | -                                | 14 | <sup>5</sup><br>7 |
| <b>So<br/>n<br/>g</b>                                                 | 2<br>0<br>1<br>0 | Lu<br>ng | 43  | 1 | GC-<br>MS                  | 1-butanol; 3-hydroxy-2-butanone                                                                                                                                                                                                                                                                                                                                                                                                                                                                                                    | 95<br>.3 <sup>r</sup>      | 85<br>.4 <sup>r</sup>      | 0<br>.<br>9<br>4 <sup>r</sup>    | 13 | <sup>5</sup><br>8 |
| <b>U<br/>l<br/>a<br/>n<br/>o<br/>w<br/>s<br/>k<br/>a</b>              | 2<br>0<br>1<br>1 | Lu<br>ng | 127 | 1 | GC-<br>MS                  | Pentanal; hexanal; nonane; ethanol; acetone; butane; dimethyl sulfide; isoprene, propanal; 1-propanol; 2-pentanone, furan; o-xylene; ethylbenzene; acetaldehyde; pentane; 3-methylpentane; pentane; butyrolactone; 2-methylbutane; 1-(methylthio)-propane; dimethyl sulfide; benzene; 3-methylfuran; propane; 4-methyloctane; N,N-dimethylacetamide 2,4-dimethylpentane; carbon disulfide                                                                                                                                          | -                          | -                          | -                                | 10 | <sup>5</sup><br>9 |
| <b>W<br/>a<br/>n<br/>g</b>                                            | 2<br>0<br>1<br>2 | Lu<br>ng | 88  | 1 | GC-<br>MS                  | Hexadecanal; 2,6,10,14-tetramethylpentadecane; eicosane; 5-(2-methyl-) propylnonane; 7-methylhexadecane; 8-methylheptadecane; 2,6-di-tert-butyl-,4-methylphenol; 2,6,11-trimethyldodecane; 3,7-dimethylpentadecane; nonadecane; 8-hexylpentadecane; 4-methyltetradecane; 2,6,10-trimethyl tetradecane; 5-(1-methyl-)propylnonane; 2-methylnapthalene; 2-methylhendecanal; nonadecanol; 2-pentadecanone; 3,7-dimethyldecane; tridecanone; 5-propyltridecane; 2,6-dimethylnapthalene; tridecane; 3,8-dimethylhedecane; 5-butylnonane | 96<br>.4<br>7 <sup>a</sup> | 97<br>.4<br>7 <sup>a</sup> | 0<br>.<br>9<br>4<br>9<br>a,<br>s | 13 | <sup>6</sup><br>0 |
| <b>W<br/>e<br/>h<br/>i<br/>n<br/>g<br/>e<br/>r</b>                    | 2<br>0<br>0<br>7 | Lu<br>ng | 17  | 1 | PTR-<br>MS                 | m/z 31 (proposed identity: formaldehyde); m/z 43 (proposed identity: iso-propanol)                                                                                                                                                                                                                                                                                                                                                                                                                                                 | 54<br>t                    | 99<br>t                    | 0<br>.<br>9<br>5<br>u            | 17 | <sup>6</sup><br>1 |

|                                                                                                                                                                                                                                                                                                                                                                                                                                                                                                                                                                                                                                                                                                                                                                                                                                                                                                                                                                                                                                                                                                                                                                                                                                                                                                                                                                                                                                                                                                                                                                                                                                                                                                                                                                                                                                                                                                                                                                                                                                                                                                                                                                                                                                                                                                                                                                                                                                                                                                                                                                                              |                  |                              |    |   |           |                                                                                                                                       |   |   |                        |    |                   |
|----------------------------------------------------------------------------------------------------------------------------------------------------------------------------------------------------------------------------------------------------------------------------------------------------------------------------------------------------------------------------------------------------------------------------------------------------------------------------------------------------------------------------------------------------------------------------------------------------------------------------------------------------------------------------------------------------------------------------------------------------------------------------------------------------------------------------------------------------------------------------------------------------------------------------------------------------------------------------------------------------------------------------------------------------------------------------------------------------------------------------------------------------------------------------------------------------------------------------------------------------------------------------------------------------------------------------------------------------------------------------------------------------------------------------------------------------------------------------------------------------------------------------------------------------------------------------------------------------------------------------------------------------------------------------------------------------------------------------------------------------------------------------------------------------------------------------------------------------------------------------------------------------------------------------------------------------------------------------------------------------------------------------------------------------------------------------------------------------------------------------------------------------------------------------------------------------------------------------------------------------------------------------------------------------------------------------------------------------------------------------------------------------------------------------------------------------------------------------------------------------------------------------------------------------------------------------------------------|------------------|------------------------------|----|---|-----------|---------------------------------------------------------------------------------------------------------------------------------------|---|---|------------------------|----|-------------------|
| <b>Zo<br/>u</b>                                                                                                                                                                                                                                                                                                                                                                                                                                                                                                                                                                                                                                                                                                                                                                                                                                                                                                                                                                                                                                                                                                                                                                                                                                                                                                                                                                                                                                                                                                                                                                                                                                                                                                                                                                                                                                                                                                                                                                                                                                                                                                                                                                                                                                                                                                                                                                                                                                                                                                                                                                              | 2<br>0<br>1<br>4 | Lu<br>ng                     | 79 | 1 | GC-<br>MS | 5-(2-methyl-)propyl-nonane; 2,6-ditert-butyl-,4-methyl-phenol; 2,6,11,-trimethyl-dodecane; hexadecanal; 8-hexyl-pentadecane,          | - | - | 1<br>.<br>0<br>a,<br>s | 22 | <sup>6</sup><br>2 |
| <b>de<br/>Ge<br/>nn<br/>aro</b>                                                                                                                                                                                                                                                                                                                                                                                                                                                                                                                                                                                                                                                                                                                                                                                                                                                                                                                                                                                                                                                                                                                                                                                                                                                                                                                                                                                                                                                                                                                                                                                                                                                                                                                                                                                                                                                                                                                                                                                                                                                                                                                                                                                                                                                                                                                                                                                                                                                                                                                                                              | 2<br>0<br>1<br>0 | Me<br>sot<br>hel<br>io<br>ma | 13 | 1 | GC-<br>MS | Cyclopentane; cyclohexane, dodecane; xylene; toluene; decane; methyl-cyclohexane; dimethyl-nonanane; benzaldehyde; limonene; b-pinene | - | - | -                      | 13 | <sup>6</sup><br>3 |
| <p>*Outcomes reported from the same study. AUC, area under the curve. STARD, Standards for Reporting of Diagnostic Accuracy Studies. H&amp;N, head &amp; neck; OG oesophagogastric. GC-MS, gas chromatography–mass spectrometry; portable GC, portable gas chromatography; TDLS, tunable diode laser absorption spectroscopy; SIFT-MS, selected ion flow tube mass spectrometry; PTR-MS, proton-transfer-reaction mass spectrometry; FT-ICR-MS, fourier transform ion cyclotron resonance mass spectrometry; SAW sensor, surface acoustic wave sensor; IMS, ion mobility spectrometry; GCxGC-FID, comprehensive two-dimensional gas chromatography with flame ionization detector; GC-TOF/MS, gas chromatography time-of-flight mass spectrometry; silicon chip-MS, silicon chip-mass spectrometry.</p> <p><sup>a</sup>Figure derived from a validated model (cancer vs. healthy control and/or benign disease). <sup>b</sup>Figure derived from non-validated model for all four compounds. <sup>c</sup>Compounds report to have a negative alveolar gradient, suggesting they are of exogenous origin. <sup>d</sup>Compound(s) not found to be significantly different between cancer patients and control subLects. <sup>e</sup>Includes patients presented in earlier publication by Xu et al., 2013. <sup>f</sup>The cut off for statistical significance was considered at <math>P &lt; 0.017</math>. <sup>g</sup>PTR-MS, n=220; GC-MS, n=65. <sup>h</sup>Compounds detected by PTR-MS. <sup>i</sup>Figures based on the 21 compounds determined by GC-MS. <sup>j</sup>Compounds considered to be of exogenous origin. <sup>k</sup>Only compounds with positive alveolar gradients are reported. <sup>l</sup>Sensitivity and specificity determined from patients with 2 or more of the 4 VOCs raised as diagnostic for the presence of cancer. <sup>m</sup>For pentanal only. <sup>n</sup>Two volatile organic compounds that were used in the model were not reported. <sup>o</sup>Figures are for cancer patients vs. all non-cancer subLects. <sup>p</sup>Figure is for 3-hydroxy-2-butanone only, cancer patients vs. healthy controls who are non-smokers. <sup>q</sup>Figure is determined for a test cut off defined by <math>\geq 1</math> standard deviation above the mean of the control population with <math>\geq 1</math> elevated cancer marker. <sup>r</sup>Figure is for 1-butanol only. <sup>s</sup>Figure is for hexadecanal only. <sup>t</sup>Model includes m/z 31, m/z 43 and age. <sup>u</sup>Figure is for iso-propanol in patients older than &gt;50yrs.</p> |                  |                              |    |   |           |                                                                                                                                       |   |   |                        |    |                   |

**eTable 5.** Cancer VOCs in exhaled breath and their chemical class.

When multiple functional groups are present, chemical class is attributed according to IUPAC priority rules (*Nomenclature of Organic Chemistry: IUPAC Recommendations and Preferred Names 2013*. (2013). Cambridge: Royal Society of Chemistry. Retrieved from <http://ebook.rsc.org/?DOI=10.1039/9781849733069>).

| Compound name                                         | Chemical classes | References              |
|-------------------------------------------------------|------------------|-------------------------|
| methanol                                              | alcohols/phenols | 27,45,56                |
| ethanol                                               | alcohols/phenols | 1,11,16,26,29,48,62     |
| 1-propanol                                            | alcohols/phenols | 27,29,30,41,43,45,51,56 |
| isopropanol                                           | alcohols/phenols | 35,41,52,55,64          |
| 1-butanol                                             | alcohols/phenols | 57,61                   |
| 2,3-butanediol                                        | alcohols/phenols | 26                      |
| 3-butyn-2-ol                                          | alcohols/phenols | 27,43                   |
| 3-methyl-1-butanol                                    | alcohols/phenols | 40                      |
| 4-penten-2-ol                                         | alcohols/phenols | 52                      |
| 1,4-dimethoxy-2,3-butanediol                          | alcohols/phenols | 7                       |
| 2-butanol,2,3-dimethyl                                | alcohols/phenols | 27                      |
| 2-butoxy-ethanol                                      | alcohols/phenols | 22,23                   |
| 2-hexanol                                             | alcohols/phenols | 40                      |
| 4-hydroxyhexanol                                      | alcohols/phenols | 59                      |
| phenol                                                | alcohols/phenols | 10,20,21,48             |
| methyl-phenol                                         | alcohols/phenols | 20,21                   |
| 2-ethyl-1 hexanol (all isomers)                       | alcohols/phenols | 10,22,48                |
| 2-ethyl-4-methyl-1-pentanol                           | alcohols/phenols | 48                      |
| 2-propyl-1-pentanol                                   | alcohols/phenols | 48                      |
| cyclooctylmethanol                                    | alcohols/phenols | 18                      |
| ethyl phenol                                          | alcohols/phenols | 20,21                   |
| 5-isopropenyl-2-methyl-7-oxabicyclo[4.1.0]heptan-2-ol | alcohols/phenols | 52                      |
| alpha terpineol                                       | alcohols/phenols | 52                      |
| butylated hydroxytoluene                              | alcohols/phenols | 48                      |
| trans-2-dodecen-1-ol                                  | alcohols/phenols | 18                      |
| 9-tetradecen-1-ol                                     | alcohols/phenols | 26                      |
| 2,6-di-tert-butyl-,4-methylphenol                     | alcohols/phenols | 63,65                   |
| nonadecanol                                           | alcohols/phenols | 63                      |
| dodecane, 4-ethyl-1-octyn-3-ol                        | alcohols/phenols | 18                      |
| formaldehyde                                          | aldehyde         | 64                      |
| 2-hydroxyacetaldehyde                                 | aldehyde         | 28,37,42,58,59          |
| acetaldehyde                                          | aldehyde         | 14,62                   |

|                                                                                 |                 |                           |
|---------------------------------------------------------------------------------|-----------------|---------------------------|
| 2-propenal                                                                      | aldehyde        | 30,55                     |
| propanal                                                                        | aldehyde        | 30,41,44,54,55,57         |
| butanal                                                                         | aldehyde        | 21,30,41,54,55,57         |
| furfural                                                                        | aldehyde        | 22,23,24                  |
| pentanal                                                                        | aldehyde        | 21,27,38,42,54,55,62      |
| 4-hydroxyhexenal (all isomers)                                                  | aldehyde        | 28,37,42,58               |
| hexanal                                                                         | aldehyde        | 2,21,31,34,38,40,41,54,62 |
| benzaldehyde                                                                    | aldehyde        | 13,27,43,66               |
| heptanal                                                                        | aldehyde        | 2,6,21,31,34,40,54        |
| octanal                                                                         | aldehyde        | 2,21,38,54                |
| hydroxy-2-nonenal                                                               | aldehyde        | 42                        |
| nonanal                                                                         | aldehyde        | 2,8,15,21,22,38,40,54     |
| trans-2-nonenal                                                                 | aldehyde        | 32                        |
| decanal                                                                         | aldehyde        | 8,13,15,21,57             |
| 2-methylundecanal                                                               | aldehyde        | 63                        |
| hexadecanal                                                                     | aldehyde        | 63,65                     |
| acetic acid                                                                     | carboxylic acid | 35                        |
| 4-hydroxybutyric acid                                                           | carboxylic acid | 10                        |
| propanoic acid, 2-methyl                                                        | carboxylic acid | 51                        |
| 2,2-dimethyl-propanoic acid                                                     | carboxylic acid | 12                        |
| pentanoic acid                                                                  | carboxylic acid | 21                        |
| hexanoic acid                                                                   | carboxylic acid | 20,21                     |
| bicyclo[3.2.2]nonane-1,5-dicarboxylic acid, 5-ethyl ester                       | carboxylic acid | 52                        |
| butyrolactone                                                                   | ester           | 62                        |
| ethyl acetate                                                                   | ester           | 16,30                     |
| 2-propenoic acid, butyl ester                                                   | ester           | 1                         |
| butyl acetate                                                                   | ester           | 27                        |
| ethyleneglycol mono vinyl ester                                                 | ester           | 10                        |
| 2-methylbutylacetate                                                            | ester           | 40                        |
| benzoic acid, 4-ethoxy-, ethyl ester                                            | ester           | 51,52                     |
| 1,2-benzenedicarboxylic acid, diethyl ester                                     | ester           | 51                        |
| 3-hydroxy- 2,4,4-trimethylpentyl 2-methylpropanoate                             | ester           | 18                        |
| 2,2,4-trimethyl-1,3-pentanediol diisobutyrate                                   | ester           | 52                        |
| pentanoic acid, 2,2,4-trimethyl-3-carboxyisopropyl, isobutylester               | ester           | 52                        |
| propanoic acid, 2-methyl-, 1-(1,1-dimethylethyl)-2-methyl-1,3-propanediyl ester | ester           | 52                        |
| isopropyl myristate                                                             | ester           | 6                         |
| pentan-1,3-dioldiisobutyrate, 2,2,4-trimethyl                                   | ester           | 51                        |
| dimethyl ether                                                                  | ether           | 48                        |

|                                                          |                        |                         |
|----------------------------------------------------------|------------------------|-------------------------|
| propane, 2-methoxy-2-methyl-                             | ether                  | 52                      |
| benzene, 1,1-oxybis                                      | ether                  | 51                      |
| furan                                                    | furan                  | 30,62                   |
| 2-methyl-furan                                           | furan                  | 55                      |
| 3-methylfuran                                            | furan                  | 55,62                   |
| 2,5-dimethyl furan                                       | furan                  | 41,51                   |
| ethane, 1,1,2-trichloro-1,2,2-trifluoro-                 | haloalkane             | 52                      |
| trichlorethylene                                         | haloalkane             | 3                       |
| 1-iodo nonane                                            | haloalkane             | 17                      |
| 1-bromo-1-(3-methyl-1-pentenylidene)-2,2,3,3-tetramethyl | haloalkane             | 10                      |
| 6-ethyl-3-octyl ester 2-trifluoromethyl benzoic acid     | haloalkane             | 4                       |
| ethane                                                   | hydrocarbon, aliphatic | 19,60                   |
| cyclopropane                                             | hydrocarbon, aliphatic | 10                      |
| propane                                                  | hydrocarbon, aliphatic | 44,55,62                |
| propene                                                  | hydrocarbon, aliphatic | 44                      |
| butane                                                   | hydrocarbon, aliphatic | 41,44,50,62             |
| isobutane                                                | hydrocarbon, aliphatic | 55                      |
| 1,2-pentadiene                                           | hydrocarbon, aliphatic | 15                      |
| 1,3-pentadiene                                           | hydrocarbon, aliphatic | 48                      |
| 1-cyclopentene                                           | hydrocarbon, aliphatic | 27                      |
| 2-butene, 2-methyl                                       | hydrocarbon, aliphatic | 27                      |
| 2-methylbutane                                           | hydrocarbon, aliphatic | 15,44,62                |
| butane ,2-methyl                                         | hydrocarbon, aliphatic | 27                      |
| cyclopentane                                             | hydrocarbon, aliphatic | 55,66                   |
| ethylidene cyclopropane                                  | hydrocarbon, aliphatic | 48                      |
| isoprene                                                 | hydrocarbon, aliphatic | 14,22,27,31,41,45,56,62 |
| pentane                                                  | hydrocarbon, aliphatic | 33,43,45,50,53,55,62    |
| 1,3-cyclopentadiene,1-methyl-                            | hydrocarbon, aliphatic | 27                      |
| 2-methylpentane                                          | hydrocarbon, aliphatic | 15,43,53                |
| 3-methylpentane                                          | hydrocarbon, aliphatic | 15,43,62                |
| benzene                                                  | hydrocarbon, aliphatic | 30,31,41,53,62          |
| cyclohexane                                              | hydrocarbon, aliphatic | 66                      |
| hexane                                                   | hydrocarbon, aliphatic | 32,43                   |
| 1,3,5-cycloheptatriene                                   | hydrocarbon, aliphatic | 48                      |
| 2,4-dimethylpentane                                      | hydrocarbon, aliphatic | 62                      |
| 2-methyl-hexane                                          | hydrocarbon, aliphatic | 48                      |
| 3,3-dimethyl pentane                                     | hydrocarbon, aliphatic | 4,48,49                 |
| 3-ethyl-pentane                                          | hydrocarbon, aliphatic | 48                      |

|                                              |                        |                         |
|----------------------------------------------|------------------------|-------------------------|
| 3-methylhexane                               | hydrocarbon, aliphatic | 3,48                    |
| heptane                                      | hydrocarbon, aliphatic | 1,50                    |
| hexane, 2 methyl                             | hydrocarbon, aliphatic | 50                      |
| hexane, 3-methyl                             | hydrocarbon, aliphatic | 50                      |
| methylcyclohexane                            | hydrocarbon, aliphatic | 15,66                   |
| 1,3,5,7-cyclooctatetraene                    | hydrocarbon, aliphatic | 48                      |
| 1-octene                                     | hydrocarbon, aliphatic | 13,47                   |
| 2,3,4-trimethyl-pentane                      | hydrocarbon, aliphatic | 48                      |
| 2,3-dimethyl-hexane                          | hydrocarbon, aliphatic | 48                      |
| 2,4-hexadiene, 2,5-dimethyl-                 | hydrocarbon, aliphatic | 51                      |
| 3,3-dimethyl-hexane                          | hydrocarbon, aliphatic | 48                      |
| 3-ethyl-hexane                               | hydrocarbon, aliphatic | 48                      |
| 5,5-dimethyl-1,3-hexadiene                   | hydrocarbon, aliphatic | 52                      |
| alpha methyl styrene                         | hydrocarbon, aliphatic | 23                      |
| ethylbenzene                                 | hydrocarbon, aliphatic | 30,32,40,46,48,53,55,57 |
| octane                                       | hydrocarbon, aliphatic | 36,53                   |
| 2,2,3-trimethyl-hexane                       | hydrocarbon, aliphatic | 48                      |
| 2,3,4-trimethyl hexane                       | hydrocarbon, aliphatic | 48,49                   |
| 2,4-dimethyl-heptane                         | hydrocarbon, aliphatic | 44,48                   |
| 4-methyl octane                              | hydrocarbon, aliphatic | 5,15,16,23,44,48,50,62  |
| nonane                                       | hydrocarbon, aliphatic | 5,36,62                 |
| 2,2,3-trimethyl-, exo- bicyclo[2.2.1]heptane | hydrocarbon, aliphatic | 12                      |
| benzene, cyclobutyl-                         | hydrocarbon, aliphatic | 27                      |
| beta-pinene                                  | hydrocarbon, aliphatic | 66                      |
| decane                                       | hydrocarbon, aliphatic | 25,31,53,66             |
| decene                                       | hydrocarbon, aliphatic | 3                       |
| limonene                                     | hydrocarbon, aliphatic | 12,66                   |
| 2,5,6-trimethyl-octane                       | hydrocarbon, aliphatic | 7                       |
| 2,6,6-trimethyl-octane                       | hydrocarbon, aliphatic | 48                      |
| 4,5-dimethyl-nonane                          | hydrocarbon, aliphatic | 13                      |
| decane, 4-methyl                             | hydrocarbon, aliphatic | 51                      |
| decane, 5-methyl                             | hydrocarbon, aliphatic | 50                      |
| dimethyl-nonane                              | hydrocarbon, aliphatic | 66                      |
| undecane                                     | hydrocarbon, aliphatic | 11,13,27,31             |
| 2,2-dimethyl decane                          | hydrocarbon, aliphatic | 9,10,12,18              |
| 2-methylundecane                             | hydrocarbon, aliphatic | 39                      |
| 3,7-dimethyldecane                           | hydrocarbon, aliphatic | 63                      |
| 4-methylundecane                             | hydrocarbon, aliphatic | 15                      |



|                                                   |                        |          |
|---------------------------------------------------|------------------------|----------|
| 5-methylundecane                                  | hydrocarbon, aliphatic | 5        |
| dodecane                                          | hydrocarbon, aliphatic | 13,40,49 |
| pentamethylheptane                                | hydrocarbon, aliphatic | 53       |
| 2,3,4-trimethyl decane                            | hydrocarbon, aliphatic | 4        |
| 3,7-dimethylundecane                              | hydrocarbon, aliphatic | 13       |
| 3,8-dimethylundecane                              | hydrocarbon, aliphatic | 63       |
| 3-methyl dodecane                                 | hydrocarbon, aliphatic | 5        |
| 4,7-dimethyl-undecane                             | hydrocarbon, aliphatic | 48       |
| 5-(1-methyl-)propylnonane                         | hydrocarbon, aliphatic | 63       |
| 5-(2-methyl-)propylnonane                         | hydrocarbon, aliphatic | 4,63     |
| 5-butylnonane                                     | hydrocarbon, aliphatic | 63       |
| nonane,5-(2-methyl-)propyl-                       | hydrocarbon, aliphatic | 65       |
| tridecane                                         | hydrocarbon, aliphatic | 5,63     |
| trimethyldecane                                   | hydrocarbon, aliphatic | 15       |
| undecane,3,7-dimethyl-                            | hydrocarbon, aliphatic | 27       |
| 2-methyltridecane                                 | hydrocarbon, aliphatic | 39       |
| 4,6-dimethyl-dodecane                             | hydrocarbon, aliphatic | 12       |
| tridecane, 3-methyl                               | hydrocarbon, aliphatic | 50       |
| tridecane, 7-methyl                               | hydrocarbon, aliphatic | 50       |
| 1,5,9-cyclododecatriene, 1,5,9-trimethyl-         | hydrocarbon, aliphatic | 51       |
| 2,6,11-trimethyldodecane                          | hydrocarbon, aliphatic | 63       |
| 2-methyltetradecane                               | hydrocarbon, aliphatic | 39       |
| 3-methyltetradecane                               | hydrocarbon, aliphatic | 39       |
| 4-methyltetradecane                               | hydrocarbon, aliphatic | 63       |
| caryophyllene                                     | hydrocarbon, aliphatic | 3,51     |
| dodecane,2,6,11,-trimethyl-                       | hydrocarbon, aliphatic | 65       |
| 3-methyl pentadecane                              | hydrocarbon, aliphatic | 5,39     |
| 5-propyltridecane                                 | hydrocarbon, aliphatic | 63       |
| hexadecane                                        | hydrocarbon, aliphatic | 8,13,23  |
| 2,6,10-trimethyl tetradecane                      | hydrocarbon, aliphatic | 63       |
| 2-methylhexadecane                                | hydrocarbon, aliphatic | 39       |
| 3,7-dimethylpentadecane                           | hydrocarbon, aliphatic | 63       |
| 7-methylhexadecane                                | hydrocarbon, aliphatic | 63       |
| 6-t-butyl-2,2,9,9-tetramethyl-3,5-decadien-7- yne | hydrocarbon, aliphatic | 18       |
| 8-methylheptadecane                               | hydrocarbon, aliphatic | 63       |
| 2,6,10,14-tetramethylpentadecane                  | hydrocarbon, aliphatic | 63       |
| nonadecane                                        | hydrocarbon, aliphatic | 63       |
| 2-methyl nonadecane                               | hydrocarbon, aliphatic | 5        |

|                                                 |                        |                                          |
|-------------------------------------------------|------------------------|------------------------------------------|
| eicosane                                        | hydrocarbon, aliphatic | 63                                       |
| 8-hexylpentadecane                              | hydrocarbon, aliphatic | 63,65                                    |
| toluene                                         | hydrocarbon, aromatic  | 9,41,46,48,49,53,66                      |
| 1,3-dimethylbenzene                             | hydrocarbon, aromatic  | 15,17                                    |
| 1,4-dimethylbenzene                             | hydrocarbon, aromatic  | 15                                       |
| bicyclo[4.2.0]octa-1,3,5-triene                 | hydrocarbon, aromatic  | 48                                       |
| styrene                                         | hydrocarbon, aromatic  | 8,22,25,31,48,55                         |
| xylene (all isomers)                            | hydrocarbon, aromatic  | 9,46,48,53,62,66                         |
| isopropyl benzene                               | hydrocarbon, aromatic  | 46                                       |
| trimethylbenzene (all isomers)                  | hydrocarbon, aromatic  | 23,31,53                                 |
| 1H-indene, 2,3-dihydro-4-methyl-                | hydrocarbon, aromatic  | 52                                       |
| 1-methyl-2-(1-methylethyl)-benzene              | hydrocarbon, aromatic  | 48                                       |
| 1-methyl-3-(1-methylethyl)-benzene              | hydrocarbon, aromatic  | 48                                       |
| 1-methyl-4-(1-methylethyl)-benzene              | hydrocarbon, aromatic  | 48,49                                    |
| naphthalene                                     | hydrocarbon, aromatic  | 3                                        |
| 2-methylnaphthalene                             | hydrocarbon, aromatic  | 63                                       |
| 2,6-dimethylnaphthalene                         | hydrocarbon, aromatic  | 63                                       |
| 1,1'-(1-butenylidene)bis benzene                | hydrocarbon, aromatic  | 17,49                                    |
| 1,1-biphenyl,2,2-diethyl-                       | hydrocarbon, aromatic  | 51                                       |
| 1H-Indene, 2,3-dihydro-1,1,3-trimethyl-3-phenyl | hydrocarbon, aromatic  | 51                                       |
| acetone                                         | ketone                 | 16,27,29,30,41,45,62                     |
| 2,3-butanedione                                 | ketone                 | 27,36                                    |
| 2-butanone                                      | ketone                 | 8,23,26,27,28,29,30,37,42,43,48,57,58,59 |
| 3-hydroxy-2-butanone                            | ketone                 | 25,27,28,37,42,58,59,61                  |
| 2-pentanone                                     | ketone                 | 6,29,30,42,44,62                         |
| 2,3-hexanedione                                 | ketone                 | 52                                       |
| 2,5-cyclohexadiene-1,4-dione                    | ketone                 | 51                                       |
| 4-methyl-2-pentanone                            | ketone                 | 15                                       |
| cyclohexanone                                   | ketone                 | 7,10,18,40                               |
| 3-hexanone, 2-methyl-                           | ketone                 | 52                                       |
| 3-pentanone,2,4-dimethyl-                       | ketone                 | 51                                       |
| 5-methyl-3-hexanone                             | ketone                 | 12                                       |
| 3-ethyl-3-methyl-2-pentanone                    | ketone                 | 48                                       |
| 5-hepten-2-one, 6-methyl                        | ketone                 | 1,22,24                                  |
| acetophenone                                    | ketone                 | 6,27                                     |
| 2-methyl-4,6-octadiyn-3-one                     | ketone                 | 48                                       |
| camphor                                         | ketone                 | 52                                       |
| tridecanone                                     | ketone                 | 63                                       |

|                                                                       |                   |             |
|-----------------------------------------------------------------------|-------------------|-------------|
| 6,10-dimethyl-5,9-dodecadien-2-one                                    | ketone            | 48          |
| 2,2,7,7-tetramethyltricyclo[6.2.1.0(1,6)]undec-4-en-3-one             | ketone            | 52          |
| 2-pentadecanone                                                       | ketone            | 63          |
| alpha isomethyl ionone                                                | ketone            | 52          |
| 2,4,6-tris(1,1-dimethyl-ethyl)-4-methylcyclohexa-2,5-dien-1-one       | ketone            | 48          |
| hydrazine                                                             | nitrogen compound | 48          |
| carbonic dihydrazide                                                  | nitrogen compound | 48          |
| hydrazine-carboxamide                                                 | nitrogen compound | 48          |
| hydrogen cyanide                                                      | nitrogen compound | 56          |
| methyl hydrazine                                                      | nitrogen compound | 48          |
| acetonitrile                                                          | nitrogen compound | 29,41,56    |
| ethylenimine                                                          | nitrogen compound | 27          |
| dimethyl formamide                                                    | nitrogen compound | 41          |
| iso-propylamin                                                        | nitrogen compound | 40          |
| 2-propenenitrile                                                      | nitrogen compound | 11,22,23,24 |
| N,N-dimethylacetamide                                                 | nitrogen compound | 62          |
| urea, tetramethyl-                                                    | nitrogen compound | 27          |
| ethylaniline                                                          | nitrogen compound | 18          |
| isoquinoline, 1,2,3,4-tetrahydro-                                     | nitrogen compound | 27          |
| 10,11-dihydro-5H-dibenz-(B,F)-azepine                                 | nitrogen compound | 51          |
| 2,3-dihydro-1-phenyl-4(1H)-quinazolinone                              | nitrogen compound | 6           |
| 2-amino-5-isopropyl-8-methyl-1-azulenecarbonitrile                    | nitrogen compound | 4,9,17      |
| 2,6-bis(1,1-dimethylethyl)-4-methyl-methylcarbamate                   | nitrogen compound | 48          |
| 4-(4-propylcyclohexyl)-4-cyano[1,1'-biphenyl]-4-yl ester benzoic acid | nitrogen compound | 17          |
| hydrogen sulphide                                                     | sulfur compound   | 14          |
| carbon disulfide                                                      | sulfur compound   | 29,55,62    |
| methyl mercaptan                                                      | sulfur compound   | 14          |
| dimethyl sulfide                                                      | sulfur compound   | 14,29,41,62 |
| 1-propene, 1-(methylthio)-, (E)-                                      | sulfur compound   | 52          |
| methyl propyl sulfide                                                 | sulfur compound   | 27,62       |
| [(1,1-dimethylethylthio) acetic acid                                  | sulfur compound   | 17          |

## References

1. Barash O, Zhang W, Halpern LM, et al. Differentiation between genetic mutations of breast cancer by breath volatolomics. *Oncotarget* 2015; **6**(42): 44864-76.
2. Li L, Peng Y, Liu Y, et al. Investigation of potential breath biomarkers for the early diagnosis of breast cancer using gas chromatography-mass spectrometry. *Clin Chim Acta* 2014; **436**: 59-67.

3. Mangler M, Freitag C, Lanowska M, Staeck O, Schneider A, Speiser D. Volatile organic compounds (VOCs) in exhaled breath of patients with breast cancer in a clinical setting. *Ginekol Pol* 2012; **83**(10): 730-6.
4. Peng G, Hakim M, Broza YY, et al. Detection of lung, breast, colorectal, and prostate cancers from exhaled breath using a single array of nanosensors. *Br L Cancer* 2010; **103**(4): 542-51. (breast)
5. Phillips M, Cataneo RN, Ditkoff BA, et al. Volatile markers of breast cancer in the breath. *Breast L* 2003; **9**(3): 184-91.
6. Phillips M, Cataneo RN, Ditkoff BA, et al. Prediction of breast cancer using volatile biomarkers in the breath. *Breast Cancer Res Treat* 2006; **99**(1): 19-21.
7. Wang C, Sun B, Guo L, et al. Volatile organic metabolites identify patients with breast cancer, cyclomastopathy, and mammary gland fibroma. *Sci Rep* 2014; **4**: 5383.
8. Amal H, Shi DY, Ionescu R, et al. Assessment of ovarian cancer conditions from exhaled breath. *Int L Cancer* 2015; **136**(6): E614-22.
9. Peng G, Hakim M, Broza YY, et al. Detection of lung, breast, colorectal, and prostate cancers from exhaled breath using a single array of nanosensors. *Br L Cancer* 2010; **103**(4): 542-51. (prostate)
10. Guo L, Wang C, Chi C, et al. Exhaled breath volatile biomarker analysis for thyroid cancer. *Transl Res* 2015; **166**(2): 188-95.
11. Gruber M, Tisch U, Leries R, et al. Analysis of exhaled breath for diagnosing head and neck squamous cell carcinoma: a feasibility study. *Br L Cancer* 2014; **111**(4): 790-8.
12. Hakim M, Billan S, Tisch U, et al. Diagnosis of head-and-neck cancer from exhaled breath. *Br L Cancer* 2011; **104**(10): 1649-55.
13. Bouza M, Gonzalez-Soto L, Pereiro R, de Vicente LC, Sanz-Medel A. Exhaled breath and oral cavity VOCs as potential biomarkers in oral cancer patients. *L Breath Res* 2017; **11**(1): 016015.
14. Szabo A, Tarnai Z, Berkovits C, et al. Volatile sulphur compound measurement with OralChroma(TM): a methodological improvement. *L Breath Res* 2015; **9**(1): 016001.
15. Altomare DF, Di Lena M, Porcelli F, et al. Exhaled volatile organic compounds identify patients with colorectal cancer. *Br L Surg* 2013; **100**(1): 144-50.
16. Amal H, LeLa M, Funka K, et al. Breath testing as potential colorectal cancer screening tool. *Int L Cancer* 2016; **138**(1): 229-36.
17. Peng G, Hakim M, Broza YY, et al. Detection of lung, breast, colorectal, and prostate cancers from exhaled breath using a single array of nanosensors. *Br L Cancer* 2010; **103**(4): 542-51. (colorectal)
18. Wang C, Ke C, Wang X, et al. Noninvasive detection of colorectal cancer by analysis of exhaled breath. *Anal Bioanal Chem* 2014; **406**(19): 4757-63.
19. Abela LE, Skeldon KD, Stuart RC, Padgett ML. Exhaled ethane concentration in patients with cancer of the upper gastrointestinal tract - a proof of concept study. *Biosci Trends* 2009; **3**(3): 110-4.

20. Kumar S, Huang L, Abbassi-Ghadi N, Spanel P, Smith D, Hanna GB. Selected ion flow tube mass spectrometry analysis of exhaled breath for volatile organic compound profiling of esophago-gastric cancer. *Anal Chem* 2013; **85**(12): 6121-8.
21. Kumar S, Huang L, Abbassi-Ghadi N, et al. Mass Spectrometric Analysis of Exhaled Breath for the Identification of Volatile Organic Compound Biomarkers in Esophageal and Gastric Adenocarcinoma. *Ann Surg* 2015; **262**(6): 981-90.
22. Amal H, LeLa M, Broza YY, et al. Geographical variation in the exhaled volatile organic compounds. *L Breath Res* 2013; **7**(4): 047102.
23. Amal H, LeLa M, Funka K, et al. Detection of precancerous gastric lesions and gastric cancer through exhaled breath. *Gut* 2016; **65**(3): 400-7.
24. Xu ZQ, Broza YY, Ionsecu R, et al. A nanomaterial-based breath test for distinguishing gastric cancer from benign gastric conditions. *Br L Cancer* 2013; **108**(4): 941-50.
25. Qin T, Liu H, Song Q, et al. The screening of volatile markers for hepatocellular carcinoma. *Cancer Epidemiol Biomarkers Prev* 2010; **19**(9): 2247-53.
26. Garcia RA, Morales V, Martin S, Vilches E, Toledano A. Volatile Organic Compounds Analysis in Breath Air in Healthy Volunteers and Patients Suffering Epidermoid Laryngeal Carcinomas. *Chromatographia* 2014; **77**(5-6): 501-9.
27. BaLtarevic A, Ager C, Pienz M, et al. Noninvasive detection of lung cancer by analysis of exhaled breath. *BMC Cancer* 2009; **9**: 348.
28. Bousamra M, 2nd, Schumer E, Li M, et al. Quantitative analysis of exhaled carbonyl compounds distinguishes benign from malignant pulmonary disease. *L Thorac Cardiovasc Surg* 2014; **148**(3): 1074-80; discussion 80-1.
29. Buszewski B, Ulanowska A, Kowalkowski T, Cieslinski K. Investigation of lung cancer biomarkers by hyphenated separation techniques and chemometrics. *Clin Chem Lab Med* 2011; **50**(3): 573-81.
30. Buszewski B, Ligor T, Leziński T, Wenda-Piesik A, Walczak M, Rudnicka L. Identification of volatile lung cancer markers by gas chromatography-mass spectrometry: comparison with discrimination by canines. *Anal Bioanal Chem* 2012; **404**(1): 141-6.
31. Chen X, Cao M, Hao Y, et al. A Non-invasive detection of lung cancer combined virtual gas sensors array with imaging recognition technique. *Conf Proc IEEE Eng Med Biol Soc* 2005; **6**: 5873-6.
32. Corradi M, Poli D, Banda I, et al. Exhaled breath analysis in suspected cases of non-small-cell lung cancer: a cross-sectional study. *L Breath Res* 2015; **9**(2): 027101.
33. Crohns M, Saarelainen S, Laitinen L, Peltonen K, Alho H, Kellokumpu-Lehtinen P. Exhaled pentane as a possible marker for survival and lipid peroxidation during radiotherapy for lung cancer--a pilot study. *Free Radic Res* 2009; **43**(10): 965-74.
34. Deng C, Zhang X, Li N. Investigation of volatile biomarkers in lung cancer blood using solid-phase microextraction and capillary gas chromatography-mass spectrometry. *L Chromatogr B Analyt Technol Biomed Life Sci* 2004; **808**(2): 269-77.
35. Feinberg T, Alkoby-Meshulam L, Herbig L, et al. Cancerous glucose metabolism in lung cancer-evidence from exhaled breath analysis. *L Breath Res* 2016; **10**(2): 026012.

36. Filipiak W, Filipiak A, Sponring A, et al. Comparative analyses of volatile organic compounds (VOCs) from patients, tumors and transformed cell lines for the validation of lung cancer-derived breath markers. *L Breath Res* 2014; **8**(2): 027111.
37. Fu XA, Li M, Knipp RL, Nantz MH, Bousamra M. Noninvasive detection of lung cancer using exhaled breath. *Cancer Med* 2014; **3**(1): 174-81.
38. Fuchs P, Loesecken C, Schubert LK, Miekisch W. Breath gas aldehydes as biomarkers of lung cancer. *Int J Cancer* 2010; **126**(11): 2663-70.
39. Gaspar EM, Lucena AF, Duro da Costa L, Chaves das Neves H. Organic metabolites in exhaled human breath--a multivariate approach for identification of biomarkers in lung disorders. *J Chromatogr A* 2009; **1216**(14): 2749-56.
40. Handa H, Usuba A, Maddula S, Baumbach LI, Mineshita M, Miyazawa T. Exhaled breath analysis for lung cancer detection using ion mobility spectrometry. *PLoS One* 2014; **9**(12): e114555.
41. Kischkel S, Miekisch W, Sawacki A, et al. Breath biomarkers for lung cancer detection and assessment of smoking related effects--confounding variables, influence of normalization and statistical algorithms. *Clin Chim Acta* 2010; **411**(21-22): 1637-44.
42. Li M, Yang D, Brock G, et al. Breath carbonyl compounds as biomarkers of lung cancer. *Lung Cancer* 2015; **90**(1): 92-7.
43. Ligor M, Ligor T, BaLtarevic A, et al. Determination of volatile organic compounds in exhaled breath of patients with lung cancer using solid phase microextraction and gas chromatography mass spectrometry. *Clin Chem Lab Med* 2009; **47**(5): 550-60.
44. Ligor T, Pater L, Buszewski B. Application of an artificial neural network model for selection of potential lung cancer biomarkers. *L Breath Res* 2015; **9**(2): 027106.
45. Ma HY, Li X, Chen LM, et al. Analysis of human breath samples of lung cancer patients and healthy controls with solid-phase microextraction (SPME) and flow-modulated comprehensive two-dimensional gas chromatography (GC x GC). *Anal Methods-Uk* 2014; **6**(17): 6841-9.
46. Ma W, Gao P, Fan L, Hashi Y, Chen Z. Determination of breath gas composition of lung cancer patients using gas chromatography/mass spectrometry with monolithic material sorptive extraction. *Biomed Chromatogr* 2015; **29**(6): 961-5.
47. Peled N, Hakim M, Bunn PA, Jr., et al. Non-invasive breath analysis of pulmonary nodules. *L Thorac Oncol* 2012; **7**(10): 1528-33.
48. Peng G, Tisch U, Adams O, et al. Diagnosing lung cancer in exhaled breath using gold nanoparticles. *Nat Nanotechnol* 2009; **4**(10): 669-73.
49. Peng G, Hakim M, Broza YY, et al. Detection of lung, breast, colorectal, and prostate cancers from exhaled breath using a single array of nanosensors. *Br J Cancer* 2010; **103**(4): 542-51. (lung)
50. Phillips M, Cataneo RN, Cummin AR, et al. Detection of lung cancer with volatile markers in the breath. *Chest* 2003; **123**(6): 2115-23.

51. Phillips M, Altorki N, Austin LH, et al. Prediction of lung cancer using volatile biomarkers in breath. *Cancer Biomark* 2007; **3**(2): 95-109.
52. Phillips M, Altorki N, Austin LH, et al. Detection of lung cancer using weighted digital analysis of breath biomarkers. *Clin Chim Acta* 2008; **393**(2): 76-84.
53. Poli D, Carbognani P, Corradi M, et al. Exhaled volatile organic compounds in patients with non-small cell lung cancer: cross sectional and nested short-term follow-up study. *Respir Res* 2005; **6**: 71.
54. Poli D, Goldoni M, Corradi M, et al. Determination of aldehydes in exhaled breath of patients with lung cancer by means of on-fiber-derivatization SPME-GC/MS. *J Chromatogr B Analyt Technol Biomed Life Sci* 2010; **878**(27): 2643-51.
55. Rudnicka L, Kowalkowski T, Ligor T, Buszewski B. Determination of volatile organic compounds as biomarkers of lung cancer by SPME-GC-TOF/MS and chemometrics. *J Chromatogr B Analyt Technol Biomed Life Sci* 2011; **879**(30): 3360-6.
56. Sakumura Y, Koyama Y, Tokutake H, et al. Diagnosis by Volatile Organic Compounds in Exhaled Breath from Lung Cancer Patients Using Support Vector Machine Algorithm. *Sensors (Basel)* 2017; **17**(2).
57. Schallschmidt K, Becker R, Lung C, et al. Comparison of volatile organic compounds from lung cancer patients and healthy controls-challenges and limitations of an observational study. *J Breath Res* 2016; **10**(4): 046007.
58. Schumer EM, Trivedi LR, van Berkel V, et al. High sensitivity for lung cancer detection using analysis of exhaled carbonyl compounds. *J Thorac Cardiovasc Surg* 2015; **150**(6): 1517-22; discussion 22-4.
59. Schumer EM, Black MC, Bousamra M, 2nd, et al. Normalization of Exhaled Carbonyl Compounds After Lung Cancer Resection. *Ann Thorac Surg* 2016; **102**(4): 1095-100.
60. Skeldon KD, McMillan LC, Wyse CA, et al. Application of laser spectroscopy for measurement of exhaled ethane in patients with lung cancer. *Respir Med* 2006; **100**(2): 300-6.
61. Song G, Qin T, Liu H, et al. Quantitative breath analysis of volatile organic compounds of lung cancer patients. *Lung Cancer* 2010; **67**(2): 227-31.
62. Ulanowska A, Kowalkowski T, Trawinska E, Buszewski B. The application of statistical methods using VOCs to identify patients with lung cancer. *J Breath Res* 2011; **5**(4): 046008.
63. Wang Y, Hu Y, Wang D, et al. The analysis of volatile organic compounds biomarkers for lung cancer in exhaled breath, tissues and cell lines. *Cancer Biomark* 2012; **11**(4): 129-37.
64. Wehinger A, Schmid A, Mechtcheriakov S, et al. Lung cancer detection by proton transfer reaction mass-spectrometric analysis of human breath gas. *Int J Mass Spectrom* 2007; **265**(1): 49-59.
65. Zou Y, Zhang X, Chen X, Hu Y, Ying K, Wang P. Optimization of volatile markers of lung cancer to exclude interferences of non-malignant disease. *Cancer Biomark* 2014; **14**(5): 371-9.
66. de Gennaro G, Dragonieri S, Longobardi F, et al. Chemical characterization of exhaled breath to differentiate between patients with malignant pleural mesothelioma from subjects with similar professional asbestos exposure. *Anal Bioanal Chem* 2010; **398**(7-8): 3043-50.

**eFigure 3.** Chemical classes of VOCs reported in different tumour sites.

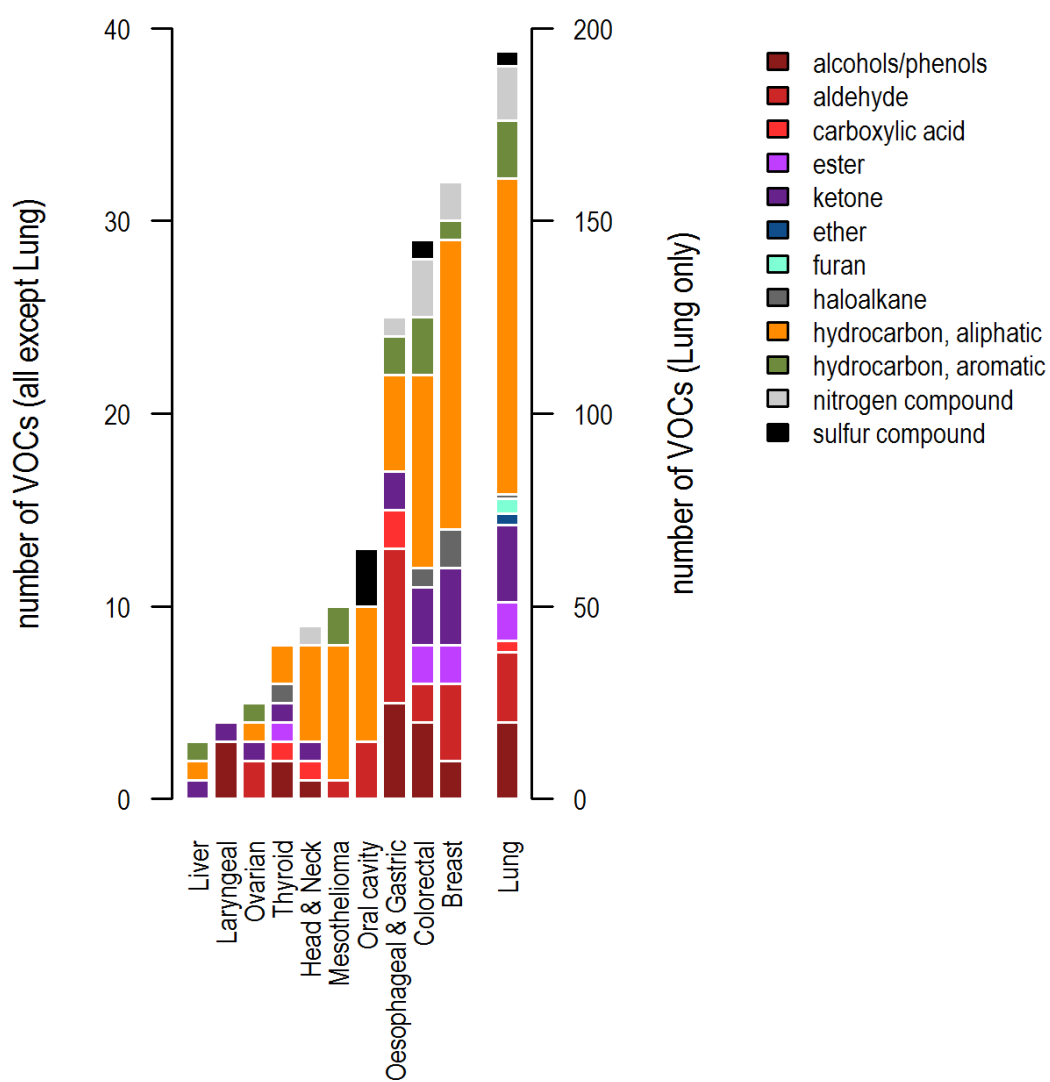



eTable 6. STARD assessment of each study

|         | Barash 2015 | Li 2014 | Mangler 2012 | Peng 2010 | Phillips 2003 | Phillips 2006 | Wang 2014 | Amal 2015 | Peng 2010 | Guo 2015 | Gruber_2014 | Hakim 2011 | Bouza 2017 | Szabó 2015 | Altomare 2013 | Amal 2016 | Peng 2010 | Wang 2014 | Abela 2009 | Kumar 2013 | Kumar 2015 | Amal_2013 | Amal 2016 | Xu 2013 | Qin 2010 | Garcia_2014 | Baltarevic 2000 | Bousamra 2014 | Buszewski 2014 | Buszewski 2015 | Chen_2005 | Corradi 2015 | Crohns 2009 | Deng 2004 | Feinberg 2016 | Filipiak 2014 | Fu 2014 | Fuchs 2010 |   |   |   |
|---------|-------------|---------|--------------|-----------|---------------|---------------|-----------|-----------|-----------|----------|-------------|------------|------------|------------|---------------|-----------|-----------|-----------|------------|------------|------------|-----------|-----------|---------|----------|-------------|-----------------|---------------|----------------|----------------|-----------|--------------|-------------|-----------|---------------|---------------|---------|------------|---|---|---|
| TITLE   | 1           | 1       | 1            | 0         | 0             | 1             | 1         | 0         | 1         | 0        | 0           | 0          | 0          | 0          | 1             | 1         | 0         | 0         | 0          | 1          | 1          | 0         | 1         | 1       | 1        | 0           | 1               | 1             | 0              | 0              | 0         | 1            | 0           | 0         | 0             | 0             | 0       | 0          | 0 | 0 |   |
| ABSTR   | 2           | 1       | 1            | 1         | 1             | 1             | 0         | 1         | 1         | 1        | 1           | 1          | 1          | 1          | 1             | 1         | 1         | 1         | 1          | 1          | 1          | 1         | 1         | 1       | 1        | 0           | 1               | 1             | 1              | 0              | 0         | 1            | 0           | 0         | 0             | 1             | 1       | 1          | 1 | 1 | 1 |
| INTRO   | 3           | 1       | 1            | 1         | 1             | 1             | 0         | 1         | 1         | 1        | 1           | 1          | 1          | 1          | 1             | 1         | 1         | 1         | 1          | 1          | 1          | 1         | 1         | 1       | 1        | 1           | 1               | 1             | 1              | 1              | 1         | 1            | 1           | 1         | 1             | 1             | 1       | 1          | 1 | 1 | 1 |
| METH    | 4           | 0       | 0            | 1         | 0             | 0             | 0         | 0         | 0         | 0        | 0           | 0          | 1          | 1          | 1             | 0         | 0         | 0         | 1          | 1          | 1          | 0         | 1         | 0       | 0        | 1           | 0               | 1             | 1              | 1              | 0         | 0            | 1           | 1         | 0             | 0             | 1       | 0          | 0 | 0 | 1 |
| Study   | 5           | 1       | 1            | 1         | 1             | 1             | 1         | 1         | 1         | 1        | 1           | 1          | 1          | 1          | 1             | 1         | 1         | 1         | 1          | 1          | 1          | 1         | 1         | 1       | 1        | 1           | 1               | 1             | 1              | 1              | 1         | 1            | 1           | 1         | 1             | 1             | 1       | 1          | 1 | 1 | 1 |
| Partici | 6           | 1       | 1            | 1         | 0             | 1             | 1         | 1         | 0         | 0        | 1           | 1          | 0          | 1          | 0             | 1         | 0         | 1         | 1          | 1          | 1          | 0         | 1         | 0       | 1        | 0           | 0               | 0             | 0              | 0              | 0         | 0            | 0           | 0         | 0             | 1             | 1       | 0          | 0 | 0 | 0 |
|         | 7           | 1       | 1            | 0         | 1             | 1             | 1         | 1         | 1         | 1        | 1           | 1          | 0          | 1          | 1             | 1         | 1         | 1         | 1          | 1          | 1          | 1         | 1         | 1       | 1        | 1           | 0               | 0             | 0              | 0              | 0         | 0            | 0           | 0         | 1             | 1             | 0       | 1          | 1 | 1 | 1 |
|         | 8           | 0       | 0            | 0         | 0             | 0             | 0         | 1         | 0         | 0        | 1           | 0          | 0          | 0          | 1             | 0         | 0         | 0         | 0          | 0          | 1          | 0         | 0         | 0       | 0        | 0           | 0               | 0             | 0              | 0              | 0         | 0            | 0           | 0         | 0             | 0             | 0       | 1          | 0 | 0 | 0 |
| Test    | 9           | 0       | 1            | 1         | 0             | 0             | 0         | 0         | 0         | 0        | 0           | 0          | 0          | 0          | 0             | 1         | 0         | 0         | 0          | 0          | 1          | 0         | 0         | 0       | 0        | 0           | 0               | 0             | 0              | 0              | 0         | 0            | 0           | 0         | 0             | 0             | 0       | 0          | 0 | 0 | 0 |
|         | 1           | 1       | 1            | 1         | 1             | 1             | 1         | 1         | 1         | 1        | 1           | 1          | 1          | 1          | 1             | 1         | 1         | 1         | 1          | 1          | 1          | 1         | 1         | 1       | 1        | 1           | 1               | 1             | 1              | 1              | 1         | 1            | 1           | 1         | 1             | 1             | 1       | 1          | 1 | 1 | 1 |
|         | 1           | 1       | 1            | 0         | 1             | 1             | 1         | 0         | 1         | 0        | 1           | 1          | 0          | 0          | 1             | 1         | 1         | 1         | 1          | 1          | 1          | 1         | 1         | 1       | 1        | 1           | 1               | 1             | 1              | 1              | 1         | 1            | 1           | 1         | 1             | 1             | 1       | 1          | 1 | 1 | 1 |
|         | 1           | 0       | 0            | 0         | 0             | 0             | 0         | 0         | 0         | 0        | 0           | 0          | 0          | 0          | 0             | 0         | 0         | 0         | 0          | 0          | 0          | 0         | 0         | 0       | 0        | 0           | 0               | 0             | 0              | 0              | 0         | 0            | 0           | 0         | 0             | 0             | 0       | 0          | 0 | 0 | 0 |
|         | 1           | 1       | 1            | 0         | 1             | 1             | 1         | 1         | 1         | 1        | 1           | 1          | 1          | 1          | 1             | 1         | 1         | 1         | 1          | 1          | 1          | 1         | 1         | 1       | 1        | 1           | 1               | 1             | 1              | 1              | 1         | 1            | 1           | 1         | 1             | 1             | 1       | 1          | 1 | 1 | 1 |
| Analys  | 1           | 0       | 0            | 0         | 0             | 0             | 0         | 0         | 0         | 0        | 0           | 0          | 0          | 0          | 0             | 0         | 0         | 0         | 0          | 0          | 0          | 0         | 0         | 0       | 0        | 0           | 0               | 0             | 0              | 0              | 0         | 0            | 0           | 0         | 0             | 0             | 0       | 0          | 0 | 0 | 0 |
|         | 1           | 1       | 1            | 1         | 0             | 1             | 1         | 0         | 0         | 1        | 0           | 0          | 0          | 0          | 1             | 0         | 0         | 0         | 0          | 1          | 1          | 0         | 1         | 1       | 1        | 1           | 0               | 1             | 1              | 1              | 0         | 0            | 0           | 0         | 0             | 0             | 0       | 0          | 0 | 1 | 0 |
|         | 1           | 0       | 0            | 0         | 0             | 0             | 0         | 0         | 0         | 0        | 0           | 0          | 0          | 0          | 0             | 0         | 0         | 0         | 0          | 0          | 0          | 0         | 0         | 0       | 0        | 0           | 0               | 0             | 0              | 0              | 0         | 0            | 0           | 0         | 0             | 0             | 0       | 0          | 0 | 0 | 0 |
|         | 1           | 0       | 0            | 0         | 0             | 0             | 0         | 0         | 0         | 0        | 0           | 0          | 0          | 0          | 0             | 0         | 0         | 0         | 0          | 0          | 0          | 0         | 0         | 0       | 0        | 0           | 0               | 0             | 0              | 0              | 0         | 0            | 0           | 0         | 0             | 0             | 0       | 0          | 0 | 0 | 0 |
|         | 1           | 0       | 1            | 0         | 1             | 1             | 0         | 0         | 1         | 1        | 1           | 0          | 0          | 1          | 0             | 0         | 1         | 0         | 0          | 0          | 0          | 0         | 1         | 0       | 1        | 0           | 1               | 0             | 0              | 0              | 0         | 0            | 0           | 0         | 0             | 0             | 0       | 0          | 0 | 0 | 0 |
| RESUL   | 1           | 0       | 0            | 0         | 0             | 0             | 0         | 0         | 0         | 0        | 0           | 0          | 0          | 0          | 0             | 0         | 0         | 0         | 0          | 0          | 0          | 0         | 0         | 0       | 0        | 0           | 0               | 0             | 0              | 0              | 0         | 0            | 0           | 0         | 0             | 0             | 0       | 0          | 0 | 0 | 0 |
| Partici | 2           | 0       | 0            | 0         | 0             | 1             | 0         | 0         | 1         | 0        | 0           | 0          | 0          | 0          | 1             | 0         | 0         | 0         | 0          | 0          | 0          | 0         | 0         | 0       | 0        | 0           | 0               | 0             | 0              | 0              | 0         | 0            | 0           | 0         | 0             | 0             | 0       | 0          | 0 | 0 | 0 |
|         | 2           | 0       | 1            | 1         | 1             | 0             | 0         | 1         | 1         | 1        | 1           | 1          | 1          | 1          | 1             | 1         | 1         | 1         | 1          | 1          | 1          | 1         | 1         | 1       | 1        | 1           | 1               | 1             | 1              | 1              | 1         | 1            | 1           | 1         | 1             | 1             | 1       | 1          | 1 | 1 | 1 |
|         | 2           | 0       | 0            | 1         | 1             | 0             | 0         | 1         | 1         | 0        | 1           | 1          | 0          | 0          | 1             | 1         | 1         | 1         | 0          | 0          | 1          | 1         | 1         | 1       | 1        | 1           | 1               | 1             | 1              | 1              | 1         | 1            | 1           | 1         | 1             | 1             | 1       | 1          | 1 | 1 | 1 |
| Test    | 2           | 0       | 1            | 0         | 1             | 0             | 0         | 1         | 1         | 0        | 0           | 0          | 0          | 0          | 0             | 0         | 0         | 0         | 0          | 0          | 0          | 0         | 0         | 0       | 0        | 0           | 0               | 0             | 0              | 0              | 0         | 0            | 0           | 0         | 0             | 0             | 0       | 0          | 0 | 0 | 0 |
|         | 2           | 1       | 1            | 0         | 0             | 1             | 1         | 0         | 0         | 0        | 0           | 0          | 0          | 0          | 1             | 0         | 0         | 0         | 0          | 0          | 0          | 0         | 0         | 0       | 0        | 0           | 0               | 0             | 0              | 0              | 0         | 0            | 0           | 0         | 0             | 0             | 0       | 0          | 0 | 0 | 0 |
|         | 2           | 1       | 1            | 0         | 0             | 0             | 0         | 0         | 0         | 0        | 0           | 0          | 0          | 0          | 0             | 1         | 0         | 0         | 0          | 1          | 0          | 0         | 1         | 1       | 1        | 1           | 0               | 0             | 0              | 0              | 0         | 0            | 0           | 0         | 0             | 0             | 0       | 0          | 0 | 0 | 0 |
| DISCU   | 2           | 0       | 0            | 0         | 0             | 0             | 0         | 0         | 0         | 0        | 0           | 0          | 0          | 0          | 0             | 0         | 0         | 0         | 0          | 0          | 0          | 0         | 0         | 0       | 0        | 0           | 0               | 0             | 0              | 0              | 0         | 0            | 0           | 0         | 0             | 0             | 0       | 0          | 0 | 0 | 0 |
|         | 2           | 1       | 1            | 0         | 0             | 1             | 0         | 1         | 0         | 0        | 1           | 0          | 0          | 0          | 0             | 1         | 0         | 0         | 0          | 0          | 1          | 1         | 0         | 1       | 0        | 0           | 1               | 1             | 0              | 0              | 0         | 0            | 0           | 0         | 0             | 0             | 0       | 0          | 0 | 0 | 0 |
|         | 2           | 1       | 1            | 1         | 1             | 1             | 0         | 1         | 1         | 1        | 1           | 1          | 1          | 0          | 1             | 1         | 1         | 1         | 1          | 1          | 1          | 1         | 1         | 1       | 1        | 1           | 0               | 1             | 1              | 0              | 0         | 0            | 0           | 0         | 0             | 0             | 0       | 0          | 0 | 0 | 0 |
| OTHER   |             |         |              |           |               |               |           |           |           |          |             |            |            |            |               |           |           |           |            |            |            |           |           |         |          |             |                 |               |                |                |           |              |             |           |               |               |         |            |   |   |   |
|         | 2           | 0       | 0            | 0         | 0             | 0             | 0         | 0         | 0         | 0        | 0           | 0          | 0          | 0          | 0             | 1         | 0         | 0         | 0          | 0          | 0          | 0         | 0         | 0       | 0        | 0           | 0               | 0             | 0              | 0              | 0         | 0            | 0           | 0         | 0             | 0             | 0       | 0          | 0 | 0 | 0 |
|         | 2           | 0       | 0            | 0         | 0             | 0             | 0         | 0         | 0         | 0        | 0           | 0          | 0          | 0          | 0             | 0         | 0         | 0         | 0          | 0          | 0          | 0         | 0         | 0       | 0        | 0           | 0               | 0             | 0              | 0              | 0         | 0            | 0           | 0         | 0             | 0             | 0       | 0          | 0 | 0 | 0 |
|         | 3           | 1       | 1            | 0         | 1             | 1             | 1         | 1         | 1         | 1        | 1           | 1          | 1          | 1          | 0             | 1         | 1         | 1         | 1          | 1          | 1          | 1         | 1         | 1       | 1        | 1           | 1               | 1             | 1              | 1              | 1         | 1            | 1           | 1         | 1             | 1             | 1       | 1          | 1 | 1 | 1 |
| TOTAL   | 1           | 2       | 1            | 1         | 1             | 1             | 1         | 1         | 1         | 1        | 1           | 1          | 1          | 1          | 2             | 2         | 1         | 1         | 1          | 1          | 2          | 1         | 2         | 2       | 1        | 8           | 1               | 1             | 1              | 1              | 5         | 6            | 2           | 1         | 7             | 1             | 1       | 1          | 1 | 1 |   |

eTable 6. STARD assessment of each study (continued)

|              |   | Gaspar 2009 | Handa 2014 | Kischkei 2010 | Li 2015 | Ligor 2009 | Ligor 2015 | Ma_2014 | Ma 2015 | Peled 2012 | Peng 2009 | Peng 2010 | Phillips 2003 | Phillips 2007 | Phillips 2008 | Poli 2005 | Poli 2010 | Rudnicka 2011 | Sakumura 2017 | Schallschmidt 2016 | Schumer 2015 | Schumer 2016 | Skeldon 2006 | Song 2010 | Ulanowska 2011 | Wang 2012 | Wehinger_2007 | Zou 2014 | de Gennaro_2010 | Mesothelioma |
|--------------|---|-------------|------------|---------------|---------|------------|------------|---------|---------|------------|-----------|-----------|---------------|---------------|---------------|-----------|-----------|---------------|---------------|--------------------|--------------|--------------|--------------|-----------|----------------|-----------|---------------|----------|-----------------|--------------|
| TITLE OR     | 1 | 0           | 1          | 0             | 1       | 1          | 1          | 0       | 0       | 0          | 0         | 0         | 1             | 1             | 1             | 1         | 1         | 0             | 1             | 1                  | 1            | 0            | 0            | 0         | 0              | 1         | 1             | 1        | 0               |              |
| ABSTRACT     | 2 | 0           | 1          | 1             | 1       | 1          | 1          | 0       | 0       | 1          | 1         | 1         | 1             | 1             | 1             | 1         | 1         | 0             | 0             | 0                  | 1            | 1            | 1            | 0         | 0              | 0         | 1             | 1        | 1               |              |
| INTRODUCTI   | 3 | 0           | 1          | 1             | 1       | 1          | 1          | 1       | 1       | 1          | 1         | 1         | 1             | 1             | 1             | 1         | 1         | 1             | 1             | 0                  | 1            | 1            | 1            | 1         | 1              | 1         | 1             | 1        | 1               |              |
|              | 4 | 0           | 1          | 0             | 0       | 2          | 0          | 0       | 0       | 0          | 0         | 0         | 0             | 0             | 0             | 1         | 1         | 0             | 0             | 1                  | 0            | 0            | 1            | 0         | 0              | 0         | 0             | 1        | 1               |              |
| METHODS      |   |             |            |               |         |            |            |         |         |            |           |           |               |               |               |           |           |               |               |                    |              |              |              |           |                |           |               |          |                 |              |
| Study design | 5 | 1           | 1          | 1             | 1       | 1          | 1          | 1       | 1       | 1          | 1         | 1         | 1             | 1             | 1             | 1         | 1         | 1             | 1             | 1                  | 1            | 1            | 1            | 1         | 1              | 1         | 1             | 1        | 1               |              |
| Participants | 6 | 0           | 0          | 0             | 0       | 0          | 0          | 1       | 0       | 0          | 0         | 0         | 1             | 0             | 0             | 0         | 0         | 0             | 0             | 0                  | 0            | 0            | 1            | 1         | 0              | 0         | 0             | 1        | 1               |              |
|              | 7 | 0           | 1          | 1             | 1       | 0          | 0          | 1       | 0       | 1          | 1         | 1         | 1             | 1             | 1             | 1         | 1         | 0             | 0             | 0                  | 0            | 1            | 1            | 1         | 1              | 1         | 1             | 1        | 1               |              |
|              | 8 | 0           | 1          | 0             | 0       | 0          | 0          | 0       | 0       | 1          | 0         | 0         | 0             | 0             | 0             | 0         | 0         | 0             | 0             | 0                  | 0            | 0            | 0            | 0         | 0              | 0         | 0             | 1        | 0               |              |
|              | 9 | 0           | 0          | 0             | 0       | 0          | 0          | 0       | 0       | 0          | 0         | 0         | 0             | 0             | 0             | 0         | 0         | 0             | 0             | 0                  | 0            | 0            | 0            | 0         | 0              | 0         | 0             | 1        | 0               |              |
| Test methods | 1 | 1           | 1          | 1             | 1       | 1          | 1          | 1       | 1       | 1          | 1         | 1         | 1             | 1             | 1             | 1         | 1         | 1             | 1             | 1                  | 1            | 1            | 1            | 1         | 1              | 1         | 1             | 1        | 1               |              |
|              | 1 | 0           | 1          | 0             | 1       | 0          | 0          | 0       | 0       | 0          | 0         | 0         | 1             | 1             | 1             | 1         | 0         | 0             | 0             | 0                  | 0            | 1            | 1            | 1         | 1              | 0         | 1             | 1        | 1               |              |
|              | 1 | 0           | 1          | 0             | 1       | 0          | 1          | 0       | 0       | 1          | 1         | 1         | 1             | 1             | 1             | 1         | 0         | 0             | 0             | 0                  | 1            | 1            | 1            | 1         | 1              | 1         | 1             | 1        | 1               |              |
|              | 1 | 0           | 0          | 0             | 0       | 0          | 0          | 0       | 0       | 0          | 0         | 0         | 0             | 0             | 0             | 0         | 0         | 0             | 0             | 0                  | 0            | 1            | 0            | 0         | 0              | 0         | 0             | 0        | 0               |              |
|              | 1 | 0           | 0          | 0             | 1       | 0          | 1          | 0       | 0       | 1          | 1         | 1         | 1             | 1             | 1             | 1         | 1         | 0             | 0             | 0                  | 0            | 1            | 1            | 1         | 1              | 1         | 1             | 1        | 1               |              |
|              | 1 | 0           | 1          | 1             | 0       | 1          | 0          | 1       | 1       | 0          | 1         | 1         | 1             | 1             | 1             | 1         | 1         | 1             | 1             | 1                  | 1            | 1            | 1            | 1         | 1              | 1         | 1             | 1        | 1               |              |
|              | 1 | 0           | 0          | 0             | 0       | 0          | 0          | 0       | 0       | 0          | 0         | 0         | 0             | 0             | 0             | 0         | 0         | 0             | 0             | 0                  | 0            | 0            | 0            | 0         | 0              | 0         | 0             | 0        | 0               |              |
| Analysis     | 1 | 1           | 1          | 0             | 1       | 1          | 1          | 0       | 0       | 0          | 0         | 0         | 1             | 1             | 1             | 1         | 1         | 0             | 0             | 1                  | 1            | 0            | 0            | 1         | 0              | 1         | 1             | 1        | 0               |              |
|              | 1 | 0           | 0          | 0             | 0       | 0          | 0          | 0       | 0       | 0          | 0         | 0         | 0             | 0             | 0             | 0         | 0         | 0             | 0             | 0                  | 0            | 0            | 0            | 0         | 0              | 0         | 0             | 0        | 0               |              |
|              | 1 | 0           | 0          | 0             | 0       | 0          | 0          | 0       | 0       | 0          | 0         | 0         | 0             | 0             | 0             | 0         | 0         | 0             | 0             | 0                  | 0            | 0            | 0            | 0         | 0              | 0         | 0             | 0        | 0               |              |
|              | 1 | 0           | 0          | 0             | 1       | 0          | 0          | 1       | 0       | 0          | 0         | 1         | 1             | 1             | 1             | 1         | 1         | 0             | 0             | 0                  | 0            | 0            | 0            | 0         | 0              | 0         | 1             | 1        | 0               |              |
|              | 1 | 0           | 0          | 0             | 0       | 0          | 0          | 0       | 0       | 0          | 0         | 0         | 0             | 0             | 0             | 0         | 0         | 0             | 0             | 0                  | 0            | 0            | 0            | 0         | 0              | 0         | 0             | 0        | 0               |              |
| RESULTS      |   |             |            |               |         |            |            |         |         |            |           |           |               |               |               |           |           |               |               |                    |              |              |              |           |                |           |               |          |                 |              |
| Participants | 1 | 0           | 0          | 0             | 0       | 0          | 0          | 0       | 0       | 0          | 0         | 0         | 1             | 1             | 0             | 0         | 0         | 0             | 0             | 0                  | 0            | 0            | 0            | 0         | 0              | 0         | 0             | 0        | 0               |              |
|              | 2 | 0           | 1          | 1             | 1       | 1          | 1          | 0       | 1       | 1          | 1         | 1         | 1             | 1             | 0             | 1         | 1         | 0             | 0             | 1                  | 1            | 1            | 0            | 1         | 1              | 1         | 1             | 1        | 1               |              |
|              | 2 | 1           | 1          | 0             | 1       | 0          | 0          | 1       | 0       | 1          | 1         | 1         | 1             | 1             | 0             | 0         | 1         | 0             | 0             | 0                  | 1            | 1            | 0            | 1         | 0              | 1         | 1             | 1        | 0               |              |
|              | 2 | 0           | 0          | 0             | 1       | 0          | 1          | 0       | 0       | 0          | 0         | 1         | 0             | 0             | 0             | 0         | 0         | 0             | 0             | 0                  | 0            | 0            | 0            | 0         | 0              | 1         | 0             | 0        | 0               |              |
| Test results | 2 | 0           | 0          | 0             | 0       | 0          | 0          | 0       | 0       | 0          | 0         | 0         | 0             | 0             | 0             | 0         | 0         | 0             | 0             | 0                  | 0            | 0            | 0            | 0         | 0              | 0         | 0             | 0        | 0               |              |
|              | 2 | 0           | 0          | 0             | 1       | 0          | 0          | 0       | 0       | 0          | 0         | 0         | 1             | 0             | 0             | 1         | 0         | 0             | 1             | 0                  | 0            | 0            | 0            | 0         | 0              | 0         | 0             | 0        | 0               |              |
|              | 2 | 0           | 0          | 0             | 1       | 0          | 0          | 1       | 0       | 1          | 0         | 0         | 0             | 1             | 0             | 1         | 0         | 1             | 0             | 0                  | 0            | 0            | 0            | 1         | 0              | 0         | 1             | 1        | 0               |              |
|              | 2 | 0           | 0          | 0             | 0       | 0          | 0          | 0       | 0       | 0          | 0         | 0         | 1             | 0             | 0             | 0         | 0         | 0             | 0             | 0                  | 0            | 0            | 0            | 0         | 0              | 0         | 0             | 0        | 0               |              |
| DISCUSSION   |   |             |            |               |         |            |            |         |         |            |           |           |               |               |               |           |           |               |               |                    |              |              |              |           |                |           |               |          |                 |              |
|              | 2 | 0           | 1          | 0             | 1       | 0          | 0          | 1       | 0       | 0          | 0         | 0         | 1             | 0             | 0             | 0         | 0         | 0             | 0             | 1                  | 1            | 1            | 1            | 0         | 0              | 0         | 1             | 1        | 0               |              |
|              | 2 | 1           | 0          | 0             | 1       | 1          | 0          | 1       | 0       | 0          | 1         | 1         | 1             | 1             | 1             | 0         | 0         | 0             | 0             | 0                  | 1            | 0            | 1            | 0         | 0              | 0         | 0             | 1        | 1               |              |
| OTHER        |   |             |            |               |         |            |            |         |         |            |           |           |               |               |               |           |           |               |               |                    |              |              |              |           |                |           |               |          |                 |              |
|              | 2 | 0           | 1          | 0             | 0       | 0          | 0          | 0       | 0       | 0          | 0         | 0         | 0             | 0             | 0             | 0         | 0         | 0             | 0             | 0                  | 0            | 0            | 0            | 0         | 0              | 0         | 0             | 0        | 0               |              |
|              | 2 | 0           | 0          | 0             | 0       | 0          | 0          | 0       | 1       | 0          | 0         | 0         | 0             | 0             | 0             | 0         | 0         | 0             | 0             | 0                  | 0            | 0            | 0            | 0         | 0              | 0         | 0             | 0        | 0               |              |
|              | 3 | 0           | 1          | 1             | 1       | 1          | 1          | 1       | 1       | 1          | 1         | 1         | 0             | 1             | 1             | 1         | 1         | 1             | 1             | 1                  | 1            | 1            | 1            | 0         | 1              | 1         | 1             | 1        | 0               |              |
| TOTAL        |   | 5           | 17         | 8             | 19      | 12         | 11         | 13      | 5       | 13         | 13        | 14        | 19            | 18            | 15            | 16        | 16        | 5             | 7             | 10                 | 14           | 13           | 14           | 13        | 10             | 13        | 17            | 22       | 13              |              |

**eTable 7.** Summary of factors reported to influence levels of volatile organic compounds within exhaled breath

| <b>Classification</b> | <b>Factor</b>                 | <b>Example</b>                                                                                                             | <b>Possible consequence</b>                                                                                                                                                                               | <b>Example of mitigation or acceptance</b>                                                                                                                                                                                             | <b>References</b>                   |
|-----------------------|-------------------------------|----------------------------------------------------------------------------------------------------------------------------|-----------------------------------------------------------------------------------------------------------------------------------------------------------------------------------------------------------|----------------------------------------------------------------------------------------------------------------------------------------------------------------------------------------------------------------------------------------|-------------------------------------|
| <b>Environmental</b>  | <b>Ambient air</b>            | Inhalation of ambient air containing variable levels of target VOCs that is dependent on the time and location of sampling | Elevated and variable levels of target VOCs within inspiratory air diminishes confidence in the ability to accurately determine that which is produced endogenously and associated with disease processes | Concurrent analysis of ambient air is advised in order to provide a reference point for VOCs levels detected in exhaled breath samples. Exclusion of VOCs found to be in high concentrations within inspired air has been recommended. | 64-97                               |
|                       | <b>Environmental exposure</b> | Inhalation of exogenous contaminants within ambient air e.g. anaesthetic gases                                             | High levels of contaminant compounds may influence the accurate detection and quantification of trace gases that are of clinical interest                                                                 | Alternatively correction of trace gas levels in ambient inhaled air through determining their specific retention coefficients has been demonstrated. Inhalation of synthetic 'clean' air another approach.                             | 84,88,98-105                        |
| <b>SubLect</b>        | <b>SubLect specific</b>       | SubLect specific factors, including: age; gender and BMI                                                                   | Such factors are recognised to significantly affect the concentrations of selected VOCs within exhaled breath                                                                                             | These factors are typically considered to be non-modifiable. Appreciation for their potential influence is however recommended.                                                                                                        | 39,72,73,76,80,87,91,93,94, 106-115 |
|                       | <b>Cardiovascular</b>         | Variation in cardiovascular parameters, including: heart rate; blood pressure and                                          | Changes in cardiorespiratory parameters are recognised                                                                                                                                                    | Recording of basic cardiorespiratory parameters should be                                                                                                                                                                              | 73,74,80,88,92,116-121              |

|  |                    |                                                                                                       |                                                                                                                                                             |                                                                                                                                                                                                                                                                                                                                                                              |                            |
|--|--------------------|-------------------------------------------------------------------------------------------------------|-------------------------------------------------------------------------------------------------------------------------------------------------------------|------------------------------------------------------------------------------------------------------------------------------------------------------------------------------------------------------------------------------------------------------------------------------------------------------------------------------------------------------------------------------|----------------------------|
|  |                    | cardiac output                                                                                        | to alter the delivery and partition of specific VOCs between the fluid and gas phases altering their concentration detected within exhaled breath           | considered at the time of breath sampling as well as a standard period of rest prior to breath testing.                                                                                                                                                                                                                                                                      |                            |
|  | <b>Respiratory</b> | Variation in respiratory parameters, including: respiratory rate and tidal volume                     |                                                                                                                                                             |                                                                                                                                                                                                                                                                                                                                                                              | 66,73,74,92,116-121        |
|  | <b>Biochemical</b> | Influence of biochemical parameters including: cholesterol; blood glucose and white blood cell counts | A relationship between biochemical parameters and the levels of selected exhaled VOCs has been reported.                                                    | For the majority of exhaled VOCs a link to a source of systemic origin and association with biochemical processes is yet to be established. Where such a link exists, recognition of its influence upon exhaled VOCs levels should be considered during the development of a clinical breath test.                                                                           | 76,92,107,108              |
|  | <b>Diet</b>        | Diet and oral intake                                                                                  | Timing of last oral intake can influence exhaled VOCs levels secondary to ingestion of exogenous contaminants and alteration of systemic metabolic pathways | Whilst the relationship between oral intake and the concentrations of specific VOCs (e.g. acetone) is well established, for many other trace gases there is inadequate evidence. Until more is known in regard to the effects of dietary intake the timing and nature of last oral intake should form part of the minimal dataset recorded at the time of breath sampling. A | 80,86,87,91-95,114,122-130 |

|                 |                                |                                                                                                          |                                                                                                                                                                                                 |                                                                                                                                                                                                                                               |                                                        |
|-----------------|--------------------------------|----------------------------------------------------------------------------------------------------------|-------------------------------------------------------------------------------------------------------------------------------------------------------------------------------------------------|-----------------------------------------------------------------------------------------------------------------------------------------------------------------------------------------------------------------------------------------------|--------------------------------------------------------|
|                 |                                |                                                                                                          |                                                                                                                                                                                                 | standard period of fasting prior to breath testing is also considered beneficial.                                                                                                                                                             |                                                        |
|                 | <b>Exercise</b>                | Variation in activity status, and related metabolic and cardiorespiratory parameters                     | The effects of exercise on metabolism and cardiorespiratory function may influence the systemic synthesis of VOCs as well as their delivery and release within the lungs                        | Recording of basic cardiorespiratory parameters should be considered at the time of breath sampling as well as a standard period of rest prior to breath testing.                                                                             | 74,76,111,116-119,125,131,132                          |
|                 | <b>Smoking</b>                 | Active and/or passive inhalation of cigarette smoke                                                      | Altered VOCs that are observed in the breath of those exposed to cigarette smoke may originate from exogenous contaminants from the smoke itself as well as local and systemic cellular changes | Documentation of smoking status as well as timing of last exposure to cigarette smoke should form part of the minimal dataset recorded at the time of breath sampling.                                                                        | 67,98,99,107-110,125,133-135                           |
|                 | <b>Inter-subject variation</b> | Inherent variation in the concentration of exhaled VOCs both within individual and groups of individuals | Knowledge of the normal variation of VOCs within the exhaled breath of healthy subjects is an essential step to determining changes brought about by disease states                             | An understanding of normal inter- and intra-subject variation is important for establish normal ranges for these VOCs. Controlling for other factors listed herein is anticipated to minimise the observed inter- and intra-subject variation | 69,70,72,75,76,87,91,93-95,108,110-115,122-125,134,136 |
|                 | <b>Intra-subject variation</b> |                                                                                                          |                                                                                                                                                                                                 |                                                                                                                                                                                                                                               | 67,70,71,76,86,90-92,110,115,117,136,137               |
| <b>Sampling</b> | <b>Breathing parameters</b>    | Parameters associated with the rate, depth and speed of exhalation                                       | Modifiable breath manoeuvres have been associated with variation of                                                                                                                             | Where possible standard practices for breath sampling should be adhered too. The                                                                                                                                                              | 80-82,86,89,90,104,121,138-143                         |

|  |                               |                                                                                                               |                                                                                                                                                                  |                                                                                                                                                                                                                                                                |                                     |
|--|-------------------------------|---------------------------------------------------------------------------------------------------------------|------------------------------------------------------------------------------------------------------------------------------------------------------------------|----------------------------------------------------------------------------------------------------------------------------------------------------------------------------------------------------------------------------------------------------------------|-------------------------------------|
|  |                               |                                                                                                               | a number of exhaled VOCs                                                                                                                                         | development of consensus guidelines for standardised analysis should be considered for selected VOCs.                                                                                                                                                          |                                     |
|  | <b>Body position</b>          | Transition between different body positions                                                                   | An association between body position at the time of breath sampling and the detected levels of certain VOCs is reported                                          | Ensuring a standard period of rest in a specific position (e.g. sitting) prior to breath testing is recommended                                                                                                                                                | 117,120                             |
|  | <b>Sample storage</b>         | The method and duration of storage of off-line breath samples                                                 | Stored breath samples are vulnerable to the effects of decay, contamination and carryover that this typically dependent upon the method and duration of storage. | Where possible on-line breath sampling should be utilised, obviating the potentially negative effects associated with sample storage. Where off-line sampling is unavoidable a suitable method should be adopted and storage time should be kept to a minimum. | 46,69,71,83,110,113,117,137,144-148 |
|  | <b>Expiratory compartment</b> | Sampling of mixed (whole) or alveolar breath samples and breath exhaled via either the oral or nasal cavities | The compartment from which breath is samples can serve to either enrich or contaminate VOC levels within collected samples                                       | Where possible standard practices for breath sampling should be adhered too. The expiratory compartment which is to sampled should be Ludiciously choose to ensure optimal detection of desired VOCs whilst avoiding unwanted                                  | 75,77,113,117                       |

|                                                                                                                                                                  |                             |                                                                                                                 |                                                                                                                             |                                                                                                                                                                                                                                                                  |                                 |
|------------------------------------------------------------------------------------------------------------------------------------------------------------------|-----------------------------|-----------------------------------------------------------------------------------------------------------------|-----------------------------------------------------------------------------------------------------------------------------|------------------------------------------------------------------------------------------------------------------------------------------------------------------------------------------------------------------------------------------------------------------|---------------------------------|
|                                                                                                                                                                  |                             |                                                                                                                 |                                                                                                                             | contamination                                                                                                                                                                                                                                                    |                                 |
| <b>Instrument</b>                                                                                                                                                | <b>Analytical technique</b> | Variation between different analytical techniques used for the detection of gas phase VOCs is poorly understood | Uncertainty in regard to the comparability of results determined using different analytical techniques                      | Cross platform validation of findings are recommended during the discovery phase of VOCs as clinical breath biomarkers                                                                                                                                           | 66,70,71,90,116,119,125,137,141 |
|                                                                                                                                                                  | <b>Reproducibility</b>      | Intra- and inter-instrument variability and reproducibility of results                                          | Reproducibility of findings both within individual and separate institutions has not been shown for the majority of trials. | Standardisation of analytical techniques and reproducibility of findings within multicentre trials should be prioritised. Investigators are encouraged to report aspects relating to the reproducibility of the chosen analytical technique                      |                                 |
|                                                                                                                                                                  | <b>Sensitivity</b>          | Intra- and inter-instrument characteristics permitting accurate detection to trace VOCs                         | The specification and capabilities of individual analytical techniques influence accuracy of VOCs detection.                | Continued refinement and judicious selection of analytical method is required to ensure the accurate detection of gas phase VOCs. Investigators are encouraged to report aspects relating to the sensitivity and reliability of the chosen analytical technique. |                                 |
|                                                                                                                                                                  | <b>Reliability</b>          |                                                                                                                 |                                                                                                                             |                                                                                                                                                                                                                                                                  |                                 |
| VOC, volatile organic compound. BMI, body mass index. PTR/-MS, proton transfer reaction - mass spectrometry. SIFT-MS, selected ion flow tube – mass spectrometry |                             |                                                                                                                 |                                                                                                                             |                                                                                                                                                                                                                                                                  |                                 |

## References

1. Barash O, Zhang W, Halpern LM, et al. Differentiation between genetic mutations of breast cancer by breath volatolomics. *Oncotarget* 2015; **6**(42): 44864-76.
2. Li L, Peng Y, Liu Y, et al. Investigation of potential breath biomarkers for the early diagnosis of breast cancer using gas chromatography-mass spectrometry. *Clin Chim Acta* 2014; **436**: 59-67.
3. Mangler M, Freitag C, Lanowska M, Staeck O, Schneider A, Speiser D. Volatile organic compounds (VOCs) in exhaled breath of patients with breast cancer in a clinical setting. *Ginekol Pol* 2012; **83**(10): 730-6.
4. Peng G, Hakim M, Broza YY, et al. Detection of lung, breast, colorectal, and prostate cancers from exhaled breath using a single array of nanosensors. *Br L Cancer* 2010; **103**(4): 542-51.
5. Phillips M, Cataneo RN, Ditkoff BA, et al. Volatile markers of breast cancer in the breath. *Breast L* 2003; **9**(3): 184-91.
6. Phillips M, Cataneo RN, Ditkoff BA, et al. Prediction of breast cancer using volatile biomarkers in the breath. *Breast Cancer Res Treat* 2006; **99**(1): 19-21.
7. Wang C, Sun B, Guo L, et al. Volatile organic metabolites identify patients with breast cancer, cyclomastopathy, and mammary gland fibroma. *Sci Rep* 2014; **4**: 5383.
8. Amal H, Shi DY, Ionescu R, et al. Assessment of ovarian cancer conditions from exhaled breath. *Int L Cancer* 2015; **136**(6): E614-22.
9. Guo L, Wang C, Chi C, et al. Exhaled breath volatile biomarker analysis for thyroid cancer. *Transl Res* 2015; **166**(2): 188-95.
10. Gruber M, Tisch U, Leries R, et al. Analysis of exhaled breath for diagnosing head and neck squamous cell carcinoma: a feasibility study. *Br L Cancer* 2014; **111**(4): 790-8.
11. Hakim M, Billan S, Tisch U, et al. Diagnosis of head-and-neck cancer from exhaled breath. *Br L Cancer* 2011; **104**(10): 1649-55.
12. Bouza M, Gonzalez-Soto L, Pereiro R, de Vicente LC, Sanz-Medel A. Exhaled breath and oral cavity VOCs as potential biomarkers in oral cancer patients. *L Breath Res* 2017; **11**(1): 016015.
13. Szabo A, Tarnai Z, Berkovits C, et al. Volatile sulphur compound measurement with OralChroma(TM): a methodological improvement. *L Breath Res* 2015; **9**(1): 016001.
14. Altomare DF, Di Lena M, Porcelli F, et al. Exhaled volatile organic compounds identify patients with colorectal cancer. *Br L Surg* 2013; **100**(1): 144-50.
15. Amal H, LeLa M, Funka K, et al. Breath testing as potential colorectal cancer screening tool. *Int L Cancer* 2016; **138**(1): 229-36.
16. Wang C, Ke C, Wang X, et al. Noninvasive detection of colorectal cancer by analysis of exhaled breath. *Anal Bioanal Chem* 2014; **406**(19): 4757-63.



17. Abela LE, Skeldon KD, Stuart RC, Padgett ML. Exhaled ethane concentration in patients with cancer of the upper gastrointestinal tract - a proof of concept study. *Biosci Trends* 2009; **3**(3): 110-4.
18. Kumar S, Huang L, Abbassi-Ghadi N, Spanel P, Smith D, Hanna GB. Selected ion flow tube mass spectrometry analysis of exhaled breath for volatile organic compound profiling of esophago-gastric cancer. *Anal Chem* 2013; **85**(12): 6121-8.
19. Kumar S, Huang L, Abbassi-Ghadi N, et al. Mass Spectrometric Analysis of Exhaled Breath for the Identification of Volatile Organic Compound Biomarkers in Esophageal and Gastric Adenocarcinoma. *Ann Surg* 2015; **262**(6): 981-90.
20. Amal H, LeLa M, Broza YY, et al. Geographical variation in the exhaled volatile organic compounds. *L Breath Res* 2013; **7**(4): 047102.
21. Amal H, LeLa M, Funka K, et al. Detection of precancerous gastric lesions and gastric cancer through exhaled breath. *Gut* 2016; **65**(3): 400-7.
22. Xu ZQ, Broza YY, Ionsecu R, et al. A nanomaterial-based breath test for distinguishing gastric cancer from benign gastric conditions. *British Journal of cancer* 2013; **108**(4): 941-50.
23. Qin T, Liu H, Song Q, et al. The screening of volatile markers for hepatocellular carcinoma. *Cancer Epidemiol Biomarkers Prev* 2010; **19**(9): 2247-53.
24. Garcia RA, Morales V, Martin S, Vilches E, Toledano A. Volatile Organic Compounds Analysis in Breath Air in Healthy Volunteers and Patients Suffering Epidermoid Laryngeal Carcinomas. *Chromatographia* 2014; **77**(5-6): 501-9.
25. BaLtarevic A, Ager C, Pienz M, et al. Noninvasive detection of lung cancer by analysis of exhaled breath. *BMC Cancer* 2009; **9**: 348.
26. Bousamra M, 2nd, Schumer E, Li M, et al. Quantitative analysis of exhaled carbonyl compounds distinguishes benign from malignant pulmonary disease. *L Thorac Cardiovasc Surg* 2014; **148**(3): 1074-80; discussion 80-1.
27. Buszewski B, Ulanowska A, Kowalkowski T, Cieslinski K. Investigation of lung cancer biomarkers by hyphenated separation techniques and chemometrics. *Clin Chem Lab Med* 2011; **50**(3): 573-81.
28. Buszewski B, Ligor T, Lezierski T, Wenda-Piesik A, Walczak M, Rudnicka L. Identification of volatile lung cancer markers by gas chromatography-mass spectrometry: comparison with discrimination by canines. *Anal Bioanal Chem* 2012; **404**(1): 141-6.
29. Chen X, Cao M, Hao Y, et al. A Non-invasive detection of lung cancer combined virtual gas sensors array with imaging recognition technique. *Conf Proc IEEE Eng Med Biol Soc* 2005; **6**: 5873-6.
30. Corradi M, Poli D, Banda I, et al. Exhaled breath analysis in suspected cases of non-small-cell lung cancer: a cross-sectional study. *L Breath Res* 2015; **9**(2): 027101.
31. Crohns M, Saarelainen S, Laitinen L, Peltonen K, Alho H, Kellokumpu-Lehtinen P. Exhaled pentane as a possible marker for survival and lipid peroxidation during radiotherapy for lung cancer--a pilot study. *Free Radic Res* 2009; **43**(10): 965-74.
32. Deng C, Zhang X, Li N. Investigation of volatile biomarkers in lung cancer blood using solid-phase microextraction and capillary gas chromatography-mass spectrometry. *L Chromatogr B Analyt Technol Biomed Life Sci* 2004; **808**(2): 269-77.

33. Feinberg T, Alkoby-Meshulam L, Herbig L, et al. Cancerous glucose metabolism in lung cancer-evidence from exhaled breath analysis. *L Breath Res* 2016; **10**(2): 026012.
34. Filipiak W, Filipiak A, Sponring A, et al. Comparative analyses of volatile organic compounds (VOCs) from patients, tumors and transformed cell lines for the validation of lung cancer-derived breath markers. *L Breath Res* 2014; **8**(2): 027111.
35. Fu XA, Li M, Knipp RL, Nantz MH, Bousamra M. Noninvasive detection of lung cancer using exhaled breath. *Cancer Med* 2014; **3**(1): 174-81.
36. Fuchs P, Loeseken C, Schubert LK, Miekisch W. Breath gas aldehydes as biomarkers of lung cancer. *Int J Cancer* 2010; **126**(11): 2663-70.
37. Gaspar EM, Lucena AF, Duro da Costa L, Chaves das Neves H. Organic metabolites in exhaled human breath--a multivariate approach for identification of biomarkers in lung disorders. *J Chromatogr A* 2009; **1216**(14): 2749-56.
38. Handa H, Usuba A, Maddula S, Baumbach LI, Mineshita M, Miyazawa T. Exhaled breath analysis for lung cancer detection using ion mobility spectrometry. *PLoS One* 2014; **9**(12): e114555.
39. Kischkel S, Miekisch W, Sawacki A, et al. Breath biomarkers for lung cancer detection and assessment of smoking related effects--confounding variables, influence of normalization and statistical algorithms. *Clin Chim Acta* 2010; **411**(21-22): 1637-44.
40. Li M, Yang D, Brock G, et al. Breath carbonyl compounds as biomarkers of lung cancer. *Lung Cancer* 2015; **90**(1): 92-7.
41. Ligor M, Ligor T, BaLtarevic A, et al. Determination of volatile organic compounds in exhaled breath of patients with lung cancer using solid phase microextraction and gas chromatography mass spectrometry. *Clin Chem Lab Med* 2009; **47**(5): 550-60.
42. Ligor T, Pater L, Buszewski B. Application of an artificial neural network model for selection of potential lung cancer biomarkers. *L Breath Res* 2015; **9**(2): 027106.
43. Ma HY, Li X, Chen LM, et al. Analysis of human breath samples of lung cancer patients and healthy controls with solid-phase microextraction (SPME) and flow-modulated comprehensive two-dimensional gas chromatography (GC x GC). *Anal Methods-Uk* 2014; **6**(17): 6841-9.
44. Ma W, Gao P, Fan L, Hashi Y, Chen Z. Determination of breath gas composition of lung cancer patients using gas chromatography/mass spectrometry with monolithic material sorptive extraction. *Biomed Chromatogr* 2015; **29**(6): 961-5.
45. Peled N, Hakim M, Bunn PA, Lr., et al. Non-invasive breath analysis of pulmonary nodules. *L Thorac Oncol* 2012; **7**(10): 1528-33.
46. Peng G, Tisch U, Adams O, et al. Diagnosing lung cancer in exhaled breath using gold nanoparticles. *Nat Nanotechnol* 2009; **4**(10): 669-73.
47. Phillips M, Cataneo RN, Cummin AR, et al. Detection of lung cancer with volatile markers in the breath. *Chest* 2003; **123**(6): 2115-23.

48. Phillips M, Altorki N, Austin LH, et al. Prediction of lung cancer using volatile biomarkers in breath. *Cancer Biomark* 2007; **3**(2): 95-109.
49. Phillips M, Altorki N, Austin LH, et al. Detection of lung cancer using weighted digital analysis of breath biomarkers. *Clin Chim Acta* 2008; **393**(2): 76-84.
50. Poli D, Carbognani P, Corradi M, et al. Exhaled volatile organic compounds in patients with non-small cell lung cancer: cross sectional and nested short-term follow-up study. *Respir Res* 2005; **6**: 71.
51. Poli D, Goldoni M, Corradi M, et al. Determination of aldehydes in exhaled breath of patients with lung cancer by means of on-fiber-derivatisation SPME-GC/MS. *J Chromatogr B Analyt Technol Biomed Life Sci* 2010; **878**(27): 2643-51.
52. Rudnicka L, Kowalkowski T, Ligor T, Buszewski B. Determination of volatile organic compounds as biomarkers of lung cancer by SPME-GC-TOF/MS and chemometrics. *J Chromatogr B Analyt Technol Biomed Life Sci* 2011; **879**(30): 3360-6.
53. Sakumura Y, Koyama Y, Tokutake H, et al. Diagnosis by Volatile Organic Compounds in Exhaled Breath from Lung Cancer Patients Using Support Vector Machine Algorithm. *Sensors (Basel)* 2017; **17**(2).
54. Schallschmidt K, Becker R, Lung C, et al. Comparison of volatile organic compounds from lung cancer patients and healthy controls-challenges and limitations of an observational study. *J Breath Res* 2016; **10**(4): 046007.
55. Schumer EM, Trivedi LR, van Berkel V, et al. High sensitivity for lung cancer detection using analysis of exhaled carbonyl compounds. *J Thorac Cardiovasc Surg* 2015; **150**(6): 1517-22; discussion 22-4.
56. Schumer EM, Black MC, Bousamra M, 2nd, et al. Normalization of Exhaled Carbonyl Compounds After Lung Cancer Resection. *Ann Thorac Surg* 2016; **102**(4): 1095-100.
57. Skeldon KD, McMillan LC, Wyse CA, et al. Application of laser spectroscopy for measurement of exhaled ethane in patients with lung cancer. *Respir Med* 2006; **100**(2): 300-6.
58. Song G, Qin T, Liu H, et al. Quantitative breath analysis of volatile organic compounds of lung cancer patients. *Lung Cancer* 2010; **67**(2): 227-31.
59. Ulanowska A, Kowalkowski T, Trawinska E, Buszewski B. The application of statistical methods using VOCs to identify patients with lung cancer. *J Breath Res* 2011; **5**(4): 046008.
60. Wang Y, Hu Y, Wang D, et al. The analysis of volatile organic compounds biomarkers for lung cancer in exhaled breath, tissues and cell lines. *Cancer Biomark* 2012; **11**(4): 129-37.
61. Wehinger A, Schmid A, Mechtcheriakov S, et al. Lung cancer detection by proton transfer reaction mass-spectrometric analysis of human breath gas. *Int J Mass Spectrom* 2007; **265**(1): 49-59.
62. Zou Y, Zhang X, Chen X, Hu Y, Ying K, Wang P. Optimization of volatile markers of lung cancer to exclude interferences of non-malignant disease. *Cancer Biomark* 2014; **14**(5): 371-9.

63. de Gennaro G, Dragonieri S, Longobardi F, et al. Chemical characterization of exhaled breath to differentiate between patients with malignant pleural mesothelioma from subLects with similar professional asbestos exposure. *Anal Bioanal Chem* 2010; **398**(7-8): 3043-50.
64. Phillips M, Greenberg L, Sabas M. Alveolar gradient of pentane in normal human breath. *Free Radic Res* 1994; **20**(5): 333-7.
65. Wade CR, van RiL AM. In vivo lipid peroxidation in man as measured by the respiratory excretion of ethane, pentane, and other low-molecular-weight hydrocarbons. *Anal Biochem* 1985; **150**(1): 1-7.
66. Schubert LK, Spittler KH, Braun G, Geiger K, Guttman L. CO(2)-controlled sampling of alveolar gas in mechanically ventilated patients. *L Appl Physiol (1985)* 2001; **90**(2): 486-92.
67. Basanta M, Ibrahim B, Douce D, Morris M, Woodcock A, Fowler SL. Methodology validation, intra-subLect reproducibility and stability of exhaled volatile organic compounds. *L Breath Res* 2012; **6**(2): 026002.
68. Schubert LK, Miekisch W, Birken T, Geiger K, Noldge-Schomburg GF. Impact of inspired substance concentrations on the results of breath analysis in mechanically ventilated patients. *Biomarkers* 2005; **10**(2-3): 138-52.
69. Arendacka B, Schwarz K, Stolc S, Wimmer G, Witkovsky V. Variability issues in determining the concentration of isoprene in human breath by PTR-MS. *L Breath Res* 2008; **2**(3): 037007.
70. Thekedar B, Szymczak W, Hollriegl V, Hoeschen C, Oeh U. Investigations on the variability of breath gas sampling using PTR-MS. *L Breath Res* 2009; **3**(2): 027007.
71. Steeghs MM, Cristescu SM, Munnik P, Zanen P, Harren FL. An off-line breath sampling and analysis method suitable for large screening studies. *Physiol Meas* 2007; **28**(5): 503-14.
72. Lechner M, Moser B, Niederseer D, et al. Gender and age specific differences in exhaled isoprene levels. *Respir Physiol Neurobiol* 2006; **154**(3): 478-83.
73. King L, Kupferthaler A, Frauscher B, et al. Measurement of endogenous acetone and isoprene in exhaled breath during sleep. *Physiol Meas* 2012; **33**(3): 413-28.
74. Unterkofler K, King L, Mochalski P, et al. Modeling-based determination of physiological parameters of systemic VOCs by breath gas analysis: a pilot study. *L Breath Res* 2015; **9**(3): 036002.
75. Pysanenko A, Spanel P, Smith D. A study of sulfur-containing compounds in mouth- and nose-exhaled breath and in the oral cavity using selected ion flow tube mass spectrometry. *L Breath Res* 2008; **2**(4): 046004.
76. Turner C, Spanel P, Smith D. A longitudinal study of breath isoprene in healthy volunteers using selected ion flow tube mass spectrometry (SIFT-MS). *Physiol Meas* 2006; **27**(1): 13-22.
77. Wang T, Pysanenko A, Dryahina K, Spanel P, Smith D. Analysis of breath, exhaled via the mouth and nose, and the air in the oral cavity. *L Breath Res* 2008; **2**(3): 037013.
78. Boshier PR, Cushnir LR, Priest OH, Marczin N, Hanna GB. Variation in the levels of volatile trace gases within three hospital environments: implications for clinical breath testing. *L Breath Res* 2010; **4**(3): 031001.

79. Knutson MD, Handelman GL, Viteri FE. Methods for measuring ethane and pentane in expired air from rats and humans. *Free Radic Biol Med* 2000; **28**(4): 514-9.
80. Cope KA, Watson MT, Foster WM, Sehnert SS, Risby TH. Effects of ventilation on the collection of exhaled breath in humans. *L Appl Physiol (1985)* 2004; **96**(4): 1371-9.
81. Larstad MA, Toren K, Bake B, Olin AC. Determination of ethane, pentane and isoprene in exhaled air--effects of breath-holding, flow rate and purified air. *Acta Physiol (Oxf)* 2007; **189**(1): 87-98.
82. Miekisch W, Kischkel S, Sawacki A, Liebau T, Mieth M, Schubert LK. Impact of sampling procedures on the results of breath analysis. *L Breath Res* 2008; **2**(2): 026007.
83. Mochalski P, King L, Klieber M, et al. Blood and breath levels of selected volatile organic compounds in healthy volunteers. *Analyst* 2013; **138**(7): 2134-45.
84. von Basum G, Dahnke H, Halmer D, Hering P, Murtz M. Online recording of ethane traces in human breath via infrared laser spectroscopy. *L Appl Physiol (1985)* 2003; **95**(6): 2583-90.
85. Maurer F, Wolf A, Fink T, et al. Wash-out of ambient air contaminations for breath measurements. *L Breath Res* 2014; **8**(2): 027107.
86. Bikov A, Paschalaki K, Logan-Sinclair R, et al. Standardised exhaled breath collection for the measurement of exhaled volatile organic compounds by proton transfer reaction mass spectrometry. *BMC Pulm Med* 2013; **13**: 43.
87. Schwarz K, Pizzini A, Arendacka B, et al. Breath acetone-aspects of normal physiology related to age and gender as determined in a PTR-MS study. *L Breath Res* 2009; **3**(2): 027003.
88. Trefz P, Schmidt M, Oertel P, et al. Continuous real time breath gas monitoring in the clinical environment by proton-transfer-reaction-time-of-flight-mass spectrometry. *Anal Chem* 2013; **85**(21): 10321-9.
89. O'Hara ME, O'Hehir S, Green S, Mayhew CA. Development of a protocol to measure volatile organic compounds in human breath: a comparison of rebreathing and on-line single exhalations using proton transfer reaction mass spectrometry. *Physiol Meas* 2008; **29**(3): 309-30.
90. Dummer LF, Storer MK, Hu WP, et al. Accurate, reproducible measurement of acetone concentration in breath using selected ion flow tube-mass spectrometry. *L Breath Res* 2010; **4**(4): 046001.
91. Turner C, Spanel P, Smith D. A longitudinal study of methanol in the exhaled breath of 30 healthy volunteers using selected ion flow tube mass spectrometry, SIFT-MS. *Physiol Meas* 2006; **27**(7): 637-48.
92. Sturney SC, Storer MK, Shaw GM, Shaw DE, Epton ML. Off-line breath acetone analysis in critical illness. *L Breath Res* 2013; **7**(3): 037102.
93. Turner C, Spanel P, Smith D. A longitudinal study of ethanol and acetaldehyde in the exhaled breath of healthy volunteers using selected-ion flow-tube mass spectrometry. *Rapid Commun Mass Spectrom* 2006; **20**(1): 61-8.
94. Turner C, Spanel P, Smith D. A longitudinal study of ammonia, acetone and propanol in the exhaled breath of 30 subLects using selected ion flow tube mass spectrometry, SIFT-MS. *Physiol Meas* 2006; **27**(4): 321-37.

95. Smith D, Spanel P, Davies S. Trace gases in breath of healthy volunteers when fasting and after a protein-calorie meal: a preliminary study. *L Appl Physiol (1985)* 1999; **87**(5): 1584-8.
96. Spanel P, Dryahina K, Smith D. A quantitative study of the influence of inhaled compounds on their concentrations in exhaled breath. *L Breath Res* 2013; **7**(1): 017106.
97. Phillips M. Method for the collection and assay of volatile organic compounds in breath. *Anal Biochem* 1997; **247**(2): 272-8.
98. Euler DE, Dave SL, Guo H. Effect of cigarette smoking on pentane excretion in alveolar breath. *Clin Chem* 1996; **42**(2): 303-8.
99. Buszewski B, Ulanowska A, Ligor T, Denderz N, Amann A. Analysis of exhaled breath from smokers, passive smokers and non-smokers by solid-phase microextraction gas chromatography/mass spectrometry. *Biomed Chromatogr* 2009; **23**(5): 551-6.
100. Wallace LA, Pellizzari E, Hartwell T, et al. Personal exposure to volatile organic compounds. I. Direct measurements in breathing-zone air, drinking water, food, and exhaled breath. *Environ Res* 1984; **35**(1): 293-319.
101. Pleil LD, Lindstrom AB. Exhaled human breath measurement method for assessing exposure to halogenated volatile organic compounds. *Clin Chem* 1997; **43**(5): 723-30.
102. Pleil LD, Lindstrom AB. Collection of a single alveolar exhaled breath for volatile organic compounds analysis. *Am L Ind Med* 1995; **28**(1): 109-21.
103. Castellanos M, Xifra G, Fernandez-Real LM, Sanchez LM. Breath gas concentrations mirror exposure to sevoflurane and isopropyl alcohol in hospital environments in non-occupational conditions. *L Breath Res* 2016; **10**(1): 016001.
104. Thekedar B, Oeh U, Szymczak W, Hoeschen C, Paretzke HG. Influences of mixed expiratory sampling parameters on exhaled volatile organic compound concentrations. *L Breath Res* 2011; **5**(1): 016001.
105. Storer M, Curry K, Squire M, Kingham S, Epton M. Breath testing and personal exposure--SIFT-MS detection of breath acetonitrile for exposure monitoring. *L Breath Res* 2015; **9**(3): 036006.
106. Diskin AM, Spanel P, Smith D. Increase of acetone and ammonia in urine headspace and breath during ovulation quantified using selected ion flow tube mass spectrometry. *Physiol Meas* 2003; **24**(1): 191-9.
107. Blanchet L, Smolinska A, Baranska A, et al. Factors that influence the volatile organic compound content in human breath. *L Breath Res* 2017; **11**(1): 016013.
108. Kushch I, Arendacka B, Stolc S, et al. Breath isoprene--aspects of normal physiology related to age, gender and cholesterol profile as determined in a proton transfer reaction mass spectrometry study. *Clin Chem Lab Med* 2008; **46**(7): 1011-8.
109. Larena-Esteban LL, Munoz-Lucas MA, Carrillo-Aranda B, et al. Volatile organic compounds in exhaled breath in a healthy population: effect of tobacco smoking. *Arch Bronconeumol* 2013; **49**(11): 457-61.

110. Huang L, Kumar S, Hanna GB. Investigation of C3-C10 aldehydes in the exhaled breath of healthy subjects using selected ion flow tube-mass spectrometry (SIFT-MS). *L Breath Res* 2014; **8**(3): 037104.
111. Senthilmohan ST, McEwan ML, Wilson PF, Milligan DB, Freeman CG. Real time analysis of breath volatiles using SIFT-MS in cigarette smoking. *Redox Rep* 2001; **6**(3): 185-7.
112. Hannemann M, AntufLew A, Borgmann K, et al. Influence of age and sex in exhaled breath samples investigated by means of infrared laser absorption spectroscopy. *L Breath Res* 2011; **5**(2): 027101.
113. Hibbard T, Killard AL. Breath ammonia levels in a normal human population study as determined by photoacoustic laser spectroscopy. *L Breath Res* 2011; **5**(3): 037101.
114. Spanel P, Dryahina K, Smith D. The concentration distributions of some metabolites in the exhaled breath of young adults. *L Breath Res* 2007; **1**(2): 026001.
115. Smith D, Spanel P, Enderby B, Lenney W, Turner C, Davies SL. Isoprene levels in the exhaled breath of 200 healthy pupils within the age range 7-18 years studied using SIFT-MS. *L Breath Res* 2010; **4**(1): 017101.
116. King L, Mochalski P, Kupferthaler A, et al. Dynamic profiles of volatile organic compounds in exhaled breath as determined by a coupled PTR-MS/GC-MS study. *Physiol Meas* 2010; **31**(9): 1169-84.
117. King L, Kupferthaler A, Unterkofler K, et al. Isoprene and acetone concentration profiles during exercise on an ergometer. *L Breath Res* 2009; **3**(2): 027006.
118. King L, Koc H, Unterkofler K, et al. Physiological modeling of isoprene dynamics in exhaled breath. *L Theor Biol* 2010; **267**(4): 626-37.
119. Schwoebel H, Schubert R, Sklorz M, et al. Phase-resolved real-time breath analysis during exercise by means of smart processing of PTR-MS data. *Anal Bioanal Chem* 2011; **401**(7): 2079-91.
120. Sukul P, Trefz P, Kamysek S, Schubert LK, Miekisch W. Instant effects of changing body positions on compositions of exhaled breath. *L Breath Res* 2015; **9**(4): 047105.
121. Sukul P, Schubert LK, Oertel P, et al. FEV manoeuvre induced changes in breath VOC compositions: an unconventional view on lung function tests. *Sci Rep* 2016; **6**: 28029.
122. Spanel P, Turner C, Wang T, Bloor R, Smith D. Generation of volatile compounds on mouth exposure to urea and sucrose: implications for exhaled breath analysis. *Physiol Meas* 2006; **27**(2): N7-17.
123. Spanel P, Dryahina K, ReLskova A, Chippendale TW, Smith D. Breath acetone concentration; biological variability and the influence of diet. *Physiol Meas* 2011; **32**(8): N23-31.
124. Spanel P, Davies S, Smith D. Quantification of breath isoprene using the selected ion flow tube mass spectrometric analytical method. *Rapid Commun Mass Spectrom* 1999; **13**(17): 1733-8.
125. Riess U, Tegtbur U, Fauck C, Fuhrmann F, Markewitz D, Salthammer T. Experimental setup and analytical methods for the non-invasive determination of volatile organic compounds, formaldehyde and NOx in exhaled human breath. *Anal Chim Acta* 2010; **669**(1-2): 53-62.

126. Baranska A, Tigchelaar E, Smolinska A, et al. Profile of volatile organic compounds in exhaled breath changes as a result of gluten-free diet. *L Breath Res* 2013; **7**(3): 037104.
127. Raninen KL, Lappi LE, Mikkala ML, et al. Fiber content of diet affects exhaled breath volatiles in fasting and postprandial state in a pilot crossover study. *Nutr Res* 2016; **36**(6): 612-9.
128. Spacek LA, Mudalel ML, Lewicki R, et al. Breath ammonia and ethanol increase in response to a high protein challenge. *Biomarkers* 2015; **20**(2): 149-56.
129. Galassetti PR, Novak B, Nemet D, et al. Breath ethanol and acetone as indicators of serum glucose levels: an initial report. *Diabetes Technol Ther* 2005; **7**(1): 115-23.
130. Lones AW. Breath-acetone concentrations in fasting healthy men: response of infrared breath-alcohol analyzers. *L Anal Toxicol* 1987; **11**(2): 67-9.
131. Yamai K, Ohkuwa T, Itoh H, Yamazaki Y, Tsuda T. Influence of cycle exercise on acetone in expired air and skin gas. *Redox Rep* 2009; **14**(6): 285-9.
132. Koc H, King L, Teschl G, et al. The role of mathematical modeling in VOC analysis using isoprene as a prototypic example. *L Breath Res* 2011; **5**(3): 037102.
133. Lo WK, Pack KW. Utilization of breath analysis for exposure estimates of benzene associated with active smoking. *Environ Res* 2000; **83**(2): 180-7.
134. Kushch I, Schwarz K, Schwentner L, et al. Compounds enhanced in a mass spectrometric profile of smokers' exhaled breath versus non-smokers as determined in a pilot study using PTR-MS. *L Breath Res* 2008; **2**(2): 026002.
135. Senthilmohan ST, Milligan DB, McEwan ML, Freeman CG, Wilson PF. Quantitative analysis of trace gases of breath during exercise using the new SIFT-MS technique. *Redox Rep* 2000; **5**(2-3): 151-3.
136. Diskin AM, Spanel P, Smith D. Time variation of ammonia, acetone, isoprene and ethanol in breath: a quantitative SIFT-MS study over 30 days. *Physiol Meas* 2003; **24**(1): 107-19.
137. Kang S, Paul Thomas CL. How long may a breath sample be stored for at -80 degrees C? A study of the stability of volatile organic compounds trapped onto a mixed Tenax:Carbograph trap adsorbent bed from exhaled breath. *L Breath Res* 2016; **10**(2): 026011.
138. Lomonaco T, Salvo P, Ghimenti S, et al. A breath sampling system assessing the influence of respiratory rate on exhaled breath composition. *Conf Proc IEEE Eng Med Biol Soc* 2015; **2015**: 7618-21.
139. Anderson LC, Lamm WL, Hlastala MP. Measuring airway exchange of endogenous acetone using a single-exhalation breathing maneuver. *L Appl Physiol (1985)* 2006; **100**(3): 880-9.
140. Boshier PR, Priest OH, Hanna GB, Marczin N. Influence of respiratory variables on the on-line detection of exhaled trace gases by PTR-MS. *Thorax* 2011; **66**(10): 919-20.
141. Boshier PR, Marczin N, Hanna GB. Repeatability of the measurement of exhaled volatile metabolites using selected ion flow tube mass spectrometry. *L Am Soc Mass Spectrom* 2010; **21**(6): 1070-4.



142. Sukul P, Trefz P, Schubert LK, Miekisch W. Immediate effects of breath holding maneuvers onto composition of exhaled breath. *L Breath Res* 2014; **8**(3): 037102.
143. Bos LD, Wang Y, Weda H, et al. A simple breath sampling method in intubated and mechanically ventilated critically ill patients. *Respir Physiol Neurobiol* 2014; **191**: 67-74.
144. Ghimenti S, Tabucchi S, Bellagambi FG, et al. Determination of sevoflurane and isopropyl alcohol in exhaled breath by thermal desorption gas chromatography-mass spectrometry for exposure assessment of hospital staff. *L Pharm Biomed Anal* 2015; **106**: 218-23.
145. Gilchrist FL, Razavi C, Webb AK, et al. An investigation of suitable bag materials for the collection and storage of breath samples containing hydrogen cyanide. *L Breath Res* 2012; **6**(3): 036004.
146. Beauchamp L, Herbig L, Gutmann R, Hansel A. On the use of Tedlar(R) bags for breath-gas sampling and analysis. *L Breath Res* 2008; **2**(4): 046001.
147. Mochalski P, Wzorek B, Sliwka I, Amann A. Suitability of different polymer bags for storage of volatile sulphur compounds relevant to breath analysis. *L Chromatogr B Analyt Technol Biomed Life Sci* 2009; **877**(3): 189-96.
148. Mochalski P, King L, Unterkofler K, Amann A. Stability of selected volatile breath constituents in Tedlar, Kynar and Flexfilm sampling bags. *Analyst* 2013; **138**(5): 1405-18.
